## Quantitative proteomics links the LRRC59 interactome to mRNA translation on the ER membrane

Molly M. Hannigan<sup>1,†</sup>, Alyson M. Hoffman<sup>2,†</sup>, J. Will Thompson<sup>3,4</sup>,  
Tianli Zheng<sup>1</sup>, and Christopher V. Nicchitta<sup>1,2\*</sup>

Departments of Cell Biology<sup>1</sup>, Biochemistry<sup>2</sup> and Pharmacology and Cancer Biology<sup>3</sup>  
Duke Proteomics and Metabolomics Shared Resource<sup>4</sup>  
Duke University School of Medicine  
Durham, North Carolina, 27710 USA

\* To whom correspondence should be addressed:

ORCID: 0000-0001-7889-1155  
E-mail: [christopher.nicchitta@duke.edu](mailto:christopher.nicchitta@duke.edu)  
Department of Cell Biology, Box 3709  
Duke University School of Medicine  
Durham, NC 27705 USA

†: Equal first authors

**Condensed title:** Spatial organization of the endoplasmic reticulum

1 **Summary**

2 Hannigan et al. characterize the protein interactomes of four ER ribosome-binding  
3 proteins, providing evidence that ER-bound ribosomes reside in distinct molecular  
4 environments. Their data link SEC62 to ER redox regulation and chaperone trafficking,  
5 and suggest a role for LRRC59 in SRP-coupled protein synthesis.

6

7 **Abstract**

8 Protein synthesis on the endoplasmic reticulum (ER) requires the dynamic coordination  
9 of resident membrane proteins and cytoplasmic translation factors. While ER membrane  
10 proteins functioning in ribosome association, mRNA anchoring, and protein translocation,  
11 have been identified, little is known regarding the higher order organization of ER-  
12 localized translation. Here we utilized proximity proteomics to identify neighboring protein  
13 networks for the ribosome interactors SEC61 $\beta$ , RPN1, SEC62, and LRRC59. Whereas  
14 the SEC61 $\beta$  and RPN1 BioID reporters revealed translocon-associated networks, the  
15 SEC62 and LRRC59 reporters identified divergent interactome networks of previously  
16 unexplored functions. Notably, the SEC62 interactome is enriched in redox-linked  
17 proteins and ER luminal chaperones, whereas the LRRC59 interactome is enriched in  
18 SRP pathway components, translation factors, and ER-localized RNA-binding proteins.  
19 Analysis of the LRRC59 interactome by native immunoprecipitation identified similar  
20 protein and functional enrichments. Combined, these data reveal a functional domain  
21 organization for the ER and suggest a key role for LRRC59 in the organization of mRNA  
22 translation on the ER.

## 23 **Introduction**

24 RNA localization and accompanying local translation serve critical roles in the  
25 spatiotemporal regulation of post-transcriptional gene expression. Reflecting the  
26 importance of such regulation, localized mRNA translation requires the coordinate  
27 localization of numerous proteins, including aminoacyl-tRNA synthetases, translation  
28 factors, RNA-binding proteins (RBPs), molecular chaperones, enzymes/scaffolding  
29 proteins which act to modify the nascent polypeptide chain, as well as *cis*-encoded mRNA  
30 localization and trafficking information (Bellon et al., 2017; Debard et al., 2017; Gu et al.,  
31 2004; Gunkel et al., 1998; Huttelmaier et al., 2005; Koppers et al., 2019; Micklem et al.,  
32 2000; Paquin et al., 2007; Smibert et al., 1999; Tiruchinapalli et al., 2003; Vidaki et al.,  
33 2017; Willett et al., 2011; Yasuda et al., 2013; Zhang et al., 2017). At the endoplasmic  
34 reticulum (ER), the primary site for secretory and membrane protein synthesis, mRNA  
35 translation becomes even more complex, requiring additional protein factors including  
36 proteins that facilitate ribosome association with the ER membrane, which includes the  
37 translocon itself, and newly discovered non-canonical integral membrane RNA-binding  
38 proteins (Beckmann et al., 2001; Berkovits and Mayr, 2015; Cui et al., 2012; Gorlich et  
39 al., 1992; Hsu et al., 2018; Jagannathan et al., 2014; Jan et al., 2014; Johnson and van  
40 Waes, 1999; Rapoport, 2007; Reid and Nicchitta, 2012; Reid and Nicchitta, 2015a;  
41 Simsek et al., 2017; Stephens et al., 2005; Voigt et al., 2017; Walter, 1981a; Walter,  
42 1981b).

43

44 An additional level of complexity to the organization of ER-localized protein synthesis  
45 appears when considering the multiple lines of evidence that support a transcriptome-

46 wide role for the ER in proteome expression (Chartron et al., 2016; Cui et al., 2012; Diehn  
47 et al., 2006; Diehn et al., 2000; Hoffman et al., 2019; Jan et al., 2014; Lerner et al., 2003;  
48 Mueckler and Pitot, 1981; Mueckler and Pitot, 1982; Reid and Nicchitta, 2012; Reid and  
49 Nicchitta, 2015a; Voigt et al., 2017). Notably, investigations of ER-localized mRNA  
50 composition in human cells, tissues, yeast, and fly revealed that all transcripts, not just  
51 those encoding secretory and membrane proteins, are translated on the ER (Chartron et  
52 al., 2016; Chen et al., 2011; Cui et al., 2012; Diehn et al., 2000; Jan et al., 2014;  
53 Kopczynski et al., 1998; Lerner et al., 2003; Mueckler and Pitot, 1981; Mueckler and Pitot,  
54 1982; Reid and Nicchitta, 2012; Reid and Nicchitta, 2015a; Voigt et al., 2017). While  
55 landmark biochemical and structural studies have advanced our understanding of how  
56 secretory/membrane protein synthesis is coupled to protein translocation, it remains  
57 unclear how translation on the ER is compartmentalized to accommodate the coincident  
58 translation of both cytosolic and secretory/membrane protein-encoding mRNAs. One  
59 model proposes that an mRNA-wide role for the ER in proteome expression is achieved  
60 by translocon-independent modes of ribosome association with the ER membrane  
61 (Harada et al., 2009; Kreibich et al., 1978a; Levy et al., 2001; Muller and Blobel, 1984;  
62 Reid and Nicchitta, 2015a; Savitz and Meyer, 1993; Tazawa et al., 1991). In this view, the  
63 SEC61 translocon serves a canonical role in secretory/membrane protein biogenesis by  
64 recruiting ribosomes engaged in the translation of this mRNA cohort, while other  
65 candidate ribosome interactors (e.g., p180, p34/LRRC59, SEC62) function as non-  
66 translocon ribosome binding sites. Ribosomes bound at these non-translocon sites may  
67 engage in the translation of both cytosolic and secretory/membrane protein-encoding  
68 transcripts. In the case of secretory/membrane polypeptides undergoing early elongation

69 on non-translocon-associated ribosomes, we postulate a process where signal  
70 sequence-bearing nascent chains access translocons via lateral diffusion (Chartron et al.,  
71 2016; Jan et al., 2014; Jan et al., 2015; Reid and Nicchitta, 2015a; Reid and Nicchitta,  
72 2015b). A primary prediction of this model is that different ribosome interacting proteins  
73 would reside in distinct membrane protein environments, perhaps reflecting the degree  
74 to which their bound ribosomes are dedicated to secretory/membrane protein synthesis.  
75 With understanding of the structural organization and regulation of ER-associated  
76 translation being largely derived from the classical canine pancreas rough microsome  
77 system, a largely unexplored question in the field thus concerns the cellular components  
78 and mechanisms that support the diversity of ER-localized translation in the cell.

79  
80 Using a BioID proximity-labeling approach to examine this model, we recently reported  
81 that SEC61 $\beta$ , a translocon subunit, and the candidate ribosome-binding protein LRRC59  
82 interact with populations of ribosomes engaged in the translation of divergent cohorts of  
83 mRNAs (Hoffman et al., 2019). In this communication, we extend these studies by  
84 investigating the ER protein interactomes of the four previously engineered BioID  
85 reporters (SEC61 $\beta$ , RPN1, SEC62, and LRRC59) (Hoffman et al., 2019). In time course  
86 labeling studies, we observed that for each reporter, proximal interactome labeling  
87 intensified but only modestly diversified as a function of labeling time, a finding consistent  
88 with a functional domain organization of the ER. Unexpectedly, our data revealed that the  
89 previously reported ribosome receptor SEC62 interacts with unique and unexpected  
90 protein networks, including those with roles in cell proliferation, signaling pathways, redox  
91 homeostasis, and cytoplasmic displaced ER luminal chaperones. In contrast, LRRC59

92 displays a highly SRP pathway-, translation-, and RNA-binding protein-enriched  
93 interactome. Both proximity proteomics and native immunoprecipitation studies found  
94 LRRC59 to interact almost exclusively with SRP machinery, non-canonical ER-RBPs, and  
95 translation initiation factors, suggesting a previously unappreciated role for LRRC59 in  
96 the organization and/or regulation of secretory/membrane protein synthesis on the ER.  
97

## 98 **Results**

### 99 ***Evidence for domain organization of ER membrane protein interactomes***

100 In a recent study, we examined the spatial organization of mRNA translation on the  
101 endoplasmic reticulum via proximity proteomics, where BioID reporters of translocon-  
102 associated (SEC61 $\beta$ , RPN1) and candidate (SEC62, LRRC59) ribosome interacting  
103 proteins were used to biotin label proximal ribosomes *in vivo*. Together with RNA-seq  
104 analysis of mRNAs isolated from the biotin-tagged ribosome populations (Hoffman et al.,  
105 2019), these studies revealed that translation on the ER membrane is heterogeneous and  
106 that ER-bound ribosomes display local environment-specific enrichments in their  
107 associated mRNAs. The mechanism(s) responsible for this regional organization of  
108 translation, however, is unknown. Here, we used proximity proteomics and the previously  
109 utilized BioID reporters to test the hypothesis that ribosome-binding proteins reside in  
110 distinct interactome networks or functional domains, as a potential mechanism to support  
111 higher order organization of mRNA translation on the ER.

112

113 In the experiments presented below, BioID reporters of known ribosome interacting  
114 proteins were used to map proximal ER membrane protein interactomes at previously  
115 identified mRNA translation sites (**Figure 1A**) (Hoffman et al., 2019). BioID proximity  
116 labeling experiments are typically conducted over many hours (Roux et al., 2012; Sears  
117 et al., 2019; Varnaite and MacNeill, 2016) (e.g. 16-24 hours), a reflection of the slow  
118 release kinetics of the reactive biotin-AMP catalytic intermediate from the BirA\* active site  
119 (Kwon and Beckett, 2000). In context of this study, we considered that such extended  
120 labeling times, coupled with reporter diffusion in the ER membrane, would confound



121 identification of proximal-interacting vs. random-interacting proteins. In line with this  
122 consideration, we expected that for each reporter, the composition of biotin-tagged  
123 proteins would diversify as a function of labeling time (Rees et al., 2015). Though it has  
124 been previously demonstrated that neighboring interactomes can be distinguished from  
125 random interactors by their higher relative labeling over non-specific controls, we first  
126 examined timecourses and patterns of biotin labeling for the BiID reporters noted above  
127 (Kim et al., 2014; Rees et al., 2015; Roux et al., 2012). The results of these experiments  
128 are shown in **Figure 1B**. Depicted are streptavidin blots of the cytosol (**C**) and membrane  
129 (**M**) protein fractions from the four BiID reporter cell lines, sampled over a labeling time  
130 course of 0–6 hours. Two observations are highlighted here. One, although the BirA  
131 domains are cytosolically disposed, biotin-tagging is strongly enriched for membrane vs.  
132 cytosolic proteins. Two, the major membrane protein biotin labeling patterns intensify but  
133 did not substantially diversify over the labeling time course (**Figure 1B**). Densitometric  
134 analysis of the biotin labeling patterns revealed by SDS-PAGE are depicted in **Figure 1B**,  
135 right panels, where it can be further appreciated that the overall labeling patterns were  
136 relatively constant over labeling time. These data suggest that the BiID interactomes of  
137 the tested reporters include largely stable membrane protein assemblies, rather than the  
138 randomizing interactomes expected of diffusion-based interactions (Goyette and Gaus,  
139 2017; Kusumi et al., 2012; Kusumi et al., 2011; Singer and Nicolson, 1972). The data  
140 presented above (**Figure 1B**) are consistent with a model where the local environments  
141 of the BiID reporters are constrained. Such spatial restriction may reflect an organization  
142 of the ER via functional interactome networks, similar to the well documented  
143 observations of plasma membrane domain organization (Goyette and Gaus, 2017;

144 Kusumi et al., 2012; Kusumi et al., 2011). We also considered that the distinctive labeling  
145 patterns of the different reporters could be influenced by ER dynamics and/or distribution  
146 biases of the reporters (e.g. tubules vs. lamellar regions). To examine these scenarios,  
147 we performed BirA\* labeling time course experiments *in vitro*, using canine pancreas  
148 rough microsomes (RM) which lack the native topology and dynamics of the ER, and a  
149 soluble, recombinant BirA\* (**Figure 1C**). Using this experimental system, the reactive  
150 biotin-AMP intermediate was delivered in *trans* and accessible to the microsome surface  
151 by solution diffusion. The results of these experiments demonstrate that when accessible  
152 to RM proteins in *trans*, biotin labeling is pervasive, with RM proteins being broadly  
153 labeled and labeling intensities increasing as a function of labeling time (**Figure 1C**, upper  
154 panel; protein loading control depicted in **Figure 1C**, lower panel). Combined, the distinct  
155 and temporally stable proximity labeling patterns identified for each BioID reporter cell  
156 line suggest that the BirA-chimeras reside in distinct protein interactome domains of the  
157 ER.

158

### 159 ***Investigation of local interactomes via TMT quantitative mass spectrometry***

160 To enable quantitative measurements of the protein interactomes schematically  
161 illustrated in **Figure 1**, an isobaric-tagging mass spectrometry analytical approach was  
162 used (TMT: tandem mass tagging) (**Figure 2A**). Isobaric labeling methods provide  
163 multiplexing and, in this case, quantitative analysis of biological replicates, enhancing the  
164 reproducibility and accuracy of datasets. Two oligomeric protein complexes known to  
165 reside at sites of translation on the ER, the SEC61 translocon and the  
166 oligosaccharyltransferase (OST) complex, were used as spatial reference points with the

167 expectation that they would label their associated subunits (**Figures 1A, 2A**). Specifically,  
168 for the SEC61 translocon, a BioID reporter of its subunit, SEC61 $\beta$ , was used to map the  
169 interactome of this well-studied complex (Becker et al., 2009; Beckmann et al., 2001;  
170 Dejgaard et al., 2010; Pfeffer et al., 2015; Voorhees et al., 2014). Similarly, ribophorin I  
171 (RPN1), a subunit of the OST complex that is transiently recruited to the SEC61  
172 translocon during nascent glycoprotein translocation, served as a parallel proximity  
173 labeling control for the local environments of ER translation sites (**Figures 1A, 2A**)  
174 (Kelleher et al., 1992; Kreibich et al., 1978a; Nilsson et al., 2003; Wild et al., 2018). To  
175 expand our analysis to less studied ER environments, we examined LRRC59 as it has  
176 been previously reported to reside proximal to ER-bound ribosomes *in vivo* (Hoffman et  
177 al., 2019) and to function in ribosome binding *in vitro* (Ichimura et al., 1993; Tazawa et al.,  
178 1991) (**Figure 1A**). We also investigated a second candidate ribosome-binding protein,  
179 SEC62, which has been demonstrated to bind ribosomes *in vitro* and to be in the vicinity  
180 of bound ribosomes in permeabilized cell models (Hoffman et al., 2019; Lang et al., 2012;  
181 Muller et al., 2010). While both LRRC59 and SEC62 have been shown to interact with  
182 ribosomes, their native protein interactomes are largely unstudied.

183

184 We established inducible Flp-In<sup>TM</sup> T-Rex<sup>TM</sup> HEK293 cell lines for each of the BioID  
185 reporters and included an empty vector negative control Flp-In<sup>TM</sup> T-Rex<sup>TM</sup> HEK293 cell  
186 line for background characterization. By the rationale detailed above, cell lines were  
187 biotin-labeled for three hours to allow for significant labeling of intracellular membrane  
188 proteins (**Figure 1B**), affinity isolated from cell extracts, digested with trypsin, derivatized  
189 with isobaric mass tag reagents, combined, and analyzed by LC-MS/MS for identification

190 of protein networks (**Figure 2A**). To enable the analysis of three biological replicates for  
191 each of the four cell lines, in addition to six study pool QC replicates, two TMT 10-plex  
192 reagent sets were utilized. Biological groups were divided between the TMT sets to avoid  
193 between-set bias, and the SPQC replicates were used to normalize between TMT sets.

194

### 195 ***Identification of ER membrane protein interactomes***

196 Quantification and identification of TMT-labeled peptides for each of the different BioID  
197 reporters were performed with Protein Discoverer 2.3 and Scaffold Q+ software. TMT  
198 signals were normalized to the total intensity within each channel, peptides derived each  
199 protein summed to represent the protein abundance, and relative protein abundance was  
200 calculated as a  $\log_2$  fold change (FC) relative to the mean of the SPQC reference  
201 channels, which represents the biological average of all samples in the experiment. In  
202 total, 1,263 proteins were identified across the entire sample set, with the majority of  
203 proteins showing modest to no reporter-specific enrichment (**Figure 2B, Supplemental**  
204 **File S1**). Violin plots in **Figure 2B** highlight the technical reproducibility of the approach.  
205 Despite SEC61 $\beta$ , RPN1, SEC62 and LRRC59 sharing similar overall  $\log_2$ FC distribution  
206 patterns (**Figure 2B**), examination of the magnitude of biotin labeling at the protein level  
207 revealed that each reporter is associated with a unique set of prominent near-neighbor  
208 interactors ( $\log_2$ FC > 1, dashed line), as summarized in the heatmap profile (**Figure 2C**),  
209 and individual reporter representations (**Figure 2D-G**). As depicted, the SEC61 $\beta$  reporter  
210 labeled other members of the SEC61 translocon, as well as a nuclear pore complex  
211 protein (**Figure 2D**); the RPN1 reporter labeled subunits of the OST complex and other  
212 glycoproteins (**Figure 2E**); the SEC62 interactome includes an array of proteins involved

213 in redox regulation, cytoskeleton architecture, and the cell cycle (**Figure 2F**); and the  
214 LRRC59 interactome included ribosome-binding proteins, RNA-binding proteins, and  
215 SRP pathway components (**Figure 2G**). Importantly, all of the bait proteins significantly  
216 labeled themselves, providing a quantitative index of relative proximity (**Figure 2D-G**).  
217 Since identification and quantification are not decoupled in isobaric tagging experiments  
218 (e.g. the identification and quantification come from the same spectrum, which is a  
219 mixture of all samples), we also performed BirA-reporter proteomic studies using label-  
220 free shotgun proteomics (not multiplexed). Although this approach did not have the  
221 proteome coverage of the TMT-tagging approach, we were able to independently verify  
222 the high-confidence interactors for each reporter. Specifically, we identified SEC61  
223 subunits, members of the OST complex, factors related to redox homeostasis and the  
224 cytoskeleton, and an enrichment of SRP machinery, translation factors and RBPs in the  
225 SEC61 $\beta$ , RPN1, SEC62, and LRRC59 interactomes, respectively, using this approach  
226 (**Supplemental Figure 1C, Supplemental File S3**). Combined, these data indicate that  
227 ER proteins can reside in discrete protein interactomes, which is consistent with a model  
228 where cohorts of functionally-related or interacting proteins comprise stable membrane  
229 domain interactomes, as previously reported for other membrane systems (de Brito and  
230 Scorrano, 2010; English and Voeltz, 2013; Helle et al., 2013; Hung et al., 2017)

231

### 232 ***Characterization of SEC61 $\beta$ and RPN1 interactomes using proximity proteomics***

233 To further characterize the protein interactomes of the reporter baits, we combined  
234 statistical prioritization, 2D clustering, and principal components analysis. This integrative  
235 approach bypasses the somewhat arbitrary requirement of filtering against a specific fold-

236 change value, and instead uses protein co-expression patterns to identify interaction  
237 networks, thereby correct for variability in protein abundance across each of our reporter  
238 cell lines. This analysis identified 145, 13, 50, and 25 high-confidence protein interactors  
239 of SEC61 $\beta$ , RPN1, SEC62, and LRRC59, respectively (**Supplemental File S2**). Since  
240 the interactomes of SEC61 $\beta$  and RPN1 are at least in part characterized, we first  
241 examined the protein networks of these two baits. In this analysis, SEC61 $\beta$  had the  
242 highest number of high-confidence interactors (n=145 proteins) (**Figure 3A**), making it  
243 the largest interactome captured by our study. Despite its large size, gene ontology (GO)  
244 analysis demonstrated that nearly all of SEC61 $\beta$  protein partners (either direct or  
245 proximal) are membrane proteins and/or have functions related to protein transport  
246 (**Figure 3B**), which aligns with the known functions of SEC61 in ER targeting, membrane  
247 insertion, and translocation of newly synthesized polypeptides (Lang et al., 2017).  
248 Moreover, almost half (44%) of the identified protein interactors are annotated to  
249 physically interact with one another, suggesting that the SEC61 $\beta$  interactome is not only  
250 enriched for membrane/secretory proteins but that these high-confidence interactors  
251 comprise large protein-protein complexes/networks (**Figure 3C**). Notably, our proteomics  
252 and protein-protein interaction (PPI) analyses revealed that SEC61 $\beta$  interacts with  
253 SEC61 $\alpha$  (SEC61A1) and SEC63 (**Figures 2D, 3C**), which is consistent with previous  
254 reports (Becker et al., 2009; Gorlich et al., 1992; Hartmann et al., 1994; Lang et al., 2012)  
255 and further validates that the putative interactors identified by our approach are likely  
256 *bona fide* targets.

257

258 In contrast to the large number of proteins identified as SEC61 $\beta$  interactors, examination  
259 of the RPN1 interactome yielded the smallest number of interactors (n=13 proteins)  
260 (**Figure 3D**). Despite its small size, about one-third of the RPN1 interactome comprises  
261 members of the OST complex (**Figure 3E-F**), including STT3B, and the  $\alpha$  and  $\beta$  subunits  
262 of the TRAP complex (SSR1, SSR3), as expected (Nilsson et al., 2003; Pfeffer et al.,  
263 2014). Additionally, our analysis revealed RPN1 to interact with 60S ribosomal proteins  
264 (RPL14, RPL23A), supporting a role for RPN1 in ribosome association (Braunger et al.,  
265 2018). Collectively, our characterizations of the SEC61 $\beta$  and RPN1 interactomes parallel  
266 high-resolution structural analyses of the SEC61 translocon, which place the OST and  
267 TRAP complexes in close physical proximity to the SEC61 oligomer (Nilsson et al., 2003;  
268 Pfeffer et al., 2014).

269

### 270 ***Functional diversity across the BioID-SEC62 interactome***

271 Following the statistical methodology described above, we interrogated the SEC62  
272 interactome. As mentioned earlier, SEC62 has been demonstrated to interact with  
273 ribosomes and to facilitate mRNA translation and protein translocation on the ER (Lang  
274 et al., 2012; Muller et al., 2010); however, a comprehensive understanding of the SEC62  
275 interactome in mammalian cells has not been previously reported. As assessed by BioID  
276 proteomics, the SEC62 interactome of HEK293 cells is comprised of a large cohort of  
277 proteins (n=50) (**Figure 4A**). Consistent with our previous study (Hoffman et al., 2019),  
278 we did not identify significant interactions of the SEC62 reporter with ribosomes,  
279 indicating that SEC62 may participate in ER translation independent of ribosome binding,  
280 as postulated for the canine pancreas rough microsome system (Jadhav et al., 2015).

281 Alternatively, the BioID reporter construct may occlude ribosome binding activity present  
282 in the native protein. To examine the functional significance of the BioID-SEC62  
283 interactome, we performed GO analysis and database mining on the 50 identified  
284 proteins. This analysis revealed that SEC62 interacts with a wide range of proteins  
285 involved in biologically diverse functions, including roles in cell cycle and proliferation,  
286 cytoskeleton architecture, protein localization, signaling pathways, ER chaperones, and  
287 redox homeostasis (**Figure 4B-C**). Since SEC62-interacting proteins have overlapping  
288 cellular functions (**Figure 4C**), we next asked if these proteins physically interact with one  
289 another to form protein complexes that may provide mechanistic insights into the  
290 biological functions of the SEC62 interactome. Protein-protein interaction analysis  
291 revealed that 54% of the SEC62 interactome physically interact with one another (**Figure**  
292 **4D**). Using literature-based searches, database mining, and informatic approaches, we  
293 assigned a primary function to each protein, as indicated by the color legend in **Figure**  
294 **4B**. In this depiction, the edges connecting interacting proteins were color coded to  
295 distinguish experimentally determined interactions from those reported/curated in  
296 databases (cyan), as annotated by the STRING database (Szklarczyk et al., 2019;  
297 Szklarczyk et al., 2017). Similar to the GO analysis, interrogation of PPI networks  
298 demonstrated heterogeneity in the functional assignment of interacting proteins. Notably,  
299 SEC62 was not reported in any of the six PPI networks, which further emphasizes the  
300 current lack of knowledge regarding SEC62 interactions in cells.

301

302 A particularly striking finding in the SEC62-BirA interactome was the presence of ER  
303 luminal-resident proteins, including PDIA3, PRDX4, and HSP90B1/GRP94. With the



304 identification of ER luminal proteins limited to the SEC62-BirA reporter line, we initially  
305 presumed that the membrane topology of the SEC62-BirA reporter was inverted from the  
306 native protein, whose N- and C-termini are cytoplasmic, thereby placing the BirA domain  
307 in the ER lumen (Linxweiler et al., 2017; Muller et al., 2010). Alternatively, and given that  
308 the ER luminal proteins identified were present in biological triplicates and exceeded  
309 significance cutoffs, these data imply that SEC62 is functionally coupled with or proximal  
310 to the recently discovered ER luminal protein reflux pathway machinery (Igbaria et al.,  
311 2019). To distinguish between these two possibilities, we examined the membrane  
312 topology of the SEC62-BirA reporter by protease protection assays, performed on  
313 digitonin-permeabilized SEC62-BirA expressing cells (**Figure 4E**). In this approach,  
314 cytosolic domains of ER membrane proteins are expected to be protease accessible,  
315 whereas ER lumen proteins are largely protected against protease digestion. GRP94 and  
316 TRAP $\alpha$ , both ER-resident proteins, were used as proteolysis topology controls. GRP94,  
317 an ER luminal protein was protected from proteinase K digestion (**Figure 4E**). In contrast,  
318 TRAP $\alpha$  is digested completely at 25  $\mu$ g/ml of proteinase K (the lowest concentration  
319 tested), with detection by a polyclonal antibody raised against the cytosolic domain  
320 (**Figure 4E**). Similar to what we observed with TRAP $\alpha$  digestion, anti-BirA reactivity was  
321 lost at the lowest proteinase K concentration tested, demonstrating that the SEC62-BirA  
322 reporter assumes the membrane topology of the native protein (**Figure 4E**). To further  
323 examine if there was an over-representation of ER luminal proteins in our SEC62-BioID  
324 dataset, we assessed the membrane vs. soluble distribution of all 50 interacting proteins  
325 using the membranOME database (Lomize et al., 2018; Lomize et al., 2017)  
326 (**Supplemental Figure 1B**). Using this approach, we determined that only 42% of the

327 SEC62 interactome is made up of membrane proteins (**Supplemental Figure 1B**). This  
328 suggests that while we did observe an enrichment of ER luminal proteins, the majority of  
329 the unique SEC62 interactors are indeed soluble proteins. Notably, this distribution  
330 between membrane vs. soluble protein interactors was mirrored in the set of high-  
331 confidence SEC62 interactors identified by the single BioID-reporter experiments, which  
332 also include ER luminal proteins (**Supplemental Figure 1C**, “Type” column). Together,  
333 these data further suggest that SEC62 may be proximal to and/or an interactor with an  
334 ER luminal protein reflux pathway. Further studies are needed to establish this putative  
335 functional link.

336

337 ***The LRRC59 interactome is enriched in the SRP pathway, ER-resident RNA-binding***  
338 ***proteins, and translation factors***

339 Previous *in vitro* studies have shown LRRC59 to interact with the 60S ribosomal subunit,  
340 however the biological importance of this interaction and the local LRRC59 membrane  
341 environment remains unknown. Following the methodology detailed above, we examined  
342 the BioID-LRRC59 interactome. As noted, our analysis identified 25 high-confidence  
343 LRRC59 interacting proteins (**Figure 5A**). Unlike the SEC62-BirA interactome which is  
344 enriched for ER functions other than mRNA translation/protein biogenesis, proteins  
345 identified in the LRRC59-BirA dataset were highly enriched for functions related to mRNA  
346 translation (e.g. eIF2A, eIF5), the SRP pathway (e.g. SRP54, SRP72), and RNA binding  
347 (e.g. MTDH, SND1) (**Figure 5B-D**). Notably, the proteins that had the highest quantitative  
348 enrichments for LRRC59-BirA labeling include LRRC59, RRBP1 (p180, ribosome-binding

349 protein), MTDH (AEG-1, an RNA-binding protein), SERBP1 (RNA-binding protein), and  
350 SRP72 (SRP protein) (**Figure 5C**, leftmost heatmap).

351

352 Similar to our previous interactome analyses, we generated a PPI network for the 25  
353 LRRC59-interacting proteins, using STRING (Szklarczyk et al., 2019; Szklarczyk et al.,  
354 2017) (**Figure 5C-D**). This analysis revealed three primary protein networks within the  
355 LRRC59 interactome: the RNA-binding proteins MTDH/AEG-1 and SND1 (Sarkar, 2013),  
356 the stress granule proteins UBAP2L and PRRC2A (Youn et al., 2018), and importantly  
357 the SRP subunit proteins SRP54, SRP68 and SRP72, indicating unusually heavy  
358 coverage of SRP (**Figure 5C-D**, depicted as pink and cyan edges linking interacting  
359 proteins). Recently, we reported that MTDH/AEG-1 is an ER-resident integral membrane  
360 RBP that predominately binds integral membrane protein-encoding transcripts (Hsu et al.,  
361 2018). Importantly, our previous study implicated MTDH/AEG-1 in the localization of  
362 secretory and membrane protein-encoding mRNAs to the ER, suggesting that LRRC59  
363 may also bind functionally-related mRNAs. SND1, which has been shown to interact with  
364 MTDH during overexpression studies in cancer models, is a tudor domain-containing  
365 protein that modulates the transcription, splicing, and stability of mRNAs related to cell  
366 proliferation, signaling pathways, and tumorigenesis (Guo et al., 2014; Li et al., 2008).  
367 These functional annotations are consistent with models where LRRC59 functions in a  
368 complex with MTDH/AEG-1 and SND1 to recruit/regulate mRNAs for translation on the  
369 ER membrane. In a similar vein, the BioID data identified LRRC59 as an SRP interactor.  
370 SRP is best characterized for its role in the signal sequence-dependent trafficking of  
371 ribosomes engaged in the translation of secretory/membrane proteins. Intriguingly, the C-

372 terminus of LRRC59 (located in the ER lumen) shares overlapping sequence structure  
373 with the SR receptor (Ohsumi et al., 1993), further implicating LRRC59 function in the  
374 SRP pathway and/or translation of secretory/membrane protein mRNAs on the ER.  
375 Additionally, the interaction of LRRC59 with the protein-protein network pair, UBAP2L-  
376 PRRC2C, may relate to mRNA regulation via stress granule assembly. Stress granules  
377 are membrane-less structures formed from non-translating mRNPs during stress (Khong  
378 et al., 2017; Protter and Parker, 2016). Stress granules are typically composed of several  
379 RNA-binding proteins, along with factors involved in translation initiation and mRNA  
380 decay. Interestingly, the LRRC59 interactome is enriched for all three classes of factors.  
381 We also report PRRC2C, a known paralog of PRRC2A which is required for the efficient  
382 formation of stress granules (Youn et al., 2018), as an LRRC59 interacting protein. These  
383 data indicate that stress granule proteins may associate with ER-compartmentalized  
384 translation centers (e.g. LRRC59 interactome). Combined with our previous study, these  
385 data demonstrate that LRRC59 associates with ER-bound ribosomes and scaffolds a  
386 protein interactome highly enriched in SRP pathway machinery and RNA-binding  
387 proteins, suggesting a relationship between LRRC59 and stress granule formation.  
388 Experiments to test these hypotheses are currently ongoing.

389

390 ***Orthogonal validation confirms the direct interaction of LRRC59 with mRNA***  
391 ***translation-related factors***

392 One limitation to a proximity proteomics approach is that the identified protein interactors  
393 cannot be distinguished as stable vs. transient interactors. To determine if LRRC59 stably  
394 interacts with SRP machinery, translation factors, and/or RNA-binding proteins, we

395 performed LRRC59 native co-immunoprecipitation (co-IP) studies followed by mass  
396 spectrometry. In brief, Caco-2 cells were cultured, detergent extracts prepared, and  
397 LRRC59 captured via indirect immunoprecipitation, using an affinity purified anti-LRRC59  
398 antisera. Following mass spectrometric analysis, raw data files were processed with  
399 Protein Discoverer and Scaffold to perform semi-quantitative analysis via total spectral  
400 counts for the identified proteins. High-confidence interacting proteins of LRRC59 were  
401 subsequently identified using CompPASS (Sowa et al., 2009), which is an unbiased,  
402 comparative proteomics software platform. In total, 2,678 prey within each IP were  
403 identified (**Figure 6A**), and of these proteins, 102 were determined to be high-confidence  
404 interacting proteins (HCIP) of LRRC59 ( $D\text{-score} \geq 1$ ) (**Figure 6B, Supplemental File S4**).  
405 Notably, 20% of these HCIPs overlapped with those determined by BioID (**Figure 6B**).  
406 As expected, these shared LRRC59 targets include SERPB1, DHX29, PRRC2C, SRP68,  
407 and LRRC59 itself, which were among the most enriched biotin-labeled proteins within  
408 the LRRC59-BirA experiment. We also recovered the other highly enriched proteins  
409 SRP72, SRP54, and RRBP1 in the LRRC59 co-IP data (**Figure 6E**); however, their D-  
410 scores (0.95, 0.92, and 0.90, respectively) were just below the conservative threshold.  
411 Given that SRP is itself a ribonucleoprotein complex, these data are consistent with SRP  
412 acting as a stable member of the LRCC59 interactome.

413

414 Since co-IP assays are generally accompanied by high background, we also co-  
415 immunoprecipitated non-specific IgG as a control. Importantly, analysis of our IgG-IP  
416 yielded only 20 HCIPs, which is a small fraction (19%) compared to the LRRC59  
417 interactome (**Figure 6C**). We did observe an enrichment of keratin proteins as HCIPs in

418 both LRRC59 and IgG interactomes (**Figure 6C**), and attribute this to common  
419 environmental contamination, as has been previously reported (Mellacheruvu et al.,  
420 2013). Thus, our data suggests that the primary *bona fide* interactors of LRRC59 are  
421 uniquely enriched by co-IP.

422

423 To assess the biological functions of all the HCIPs that directly interact with LRRC59  
424 (n=102), we performed GO analysis. Consistent with our observations of the BioID-  
425 LRRC59 interactome, HCIPs determined by co-IP were also strongly enriched for proteins  
426 with functions related to mRNA translation and RNA binding (**Figure 6D**, left side). In  
427 contrast, non-immune IgG high-confidence interactors were only mildly enriched in  
428 common background proteins (Mellacheruvu et al., 2013) (**Figure 6D**, right side).  
429 Therefore, our data collectively demonstrates that LRRC59 directly interacts with SRP  
430 machinery, translation initiation factors, and RNA-binding proteins.

431

## 432 **Discussion**

433 While the protein machinery involved in secretory and membrane biogenesis on the ER  
434 is well established, it remains unclear how mRNA translation on the ER, including  
435 translation of cytosolic protein-encoding mRNAs, is spatially organized in cells. Moreover,  
436 our understanding of how the resident ER proteome contributes to mRNA localization,  
437 anchoring, and translational control is lacking. In this communication, we examine these  
438 questions by characterizing the protein interactomes of known and candidate ER-resident  
439 ribosome receptors in the mammalian cell line HEK293. Of particular interest, our data  
440 place LRRC59 in a functional nexus for secretory and membrane protein synthesis via  
441 interactions with SRP, translation initiation factors, and RNA-binding proteins. Combined,  
442 the results of this study reveal new modes of compartmentalized mRNA translation and  
443 expand upon the canonical understanding of the SRP pathway.

444

### 445 ***Functional domain organization of the ER membrane***

446 The endoplasmic reticulum is a structurally complex organelle known to serve multiple  
447 functions, including mRNA translation, protein translocation, protein folding, post-  
448 translational protein modifications, lipid biosynthesis, and calcium transport (English and  
449 Voeltz, 2013; Schwarz and Blower, 2016). In addition, the ER contains specialized  
450 domains dedicated to interactions with other membrane organelles, such as the  
451 mitochondria and endosomes, and was recently demonstrated to participate in stress  
452 granule and processing body dynamics (Cohen et al., 2018; Lee et al., 2020; Murley and  
453 Nunnari, 2016; Wu et al., 2018). With the regulation of dynamic ER morphology and  
454 organelle-organelle interactions under active investigation, insights into the spatial

455 organization of the ER membrane and how this higher order is necessary to  
456 accommodate its wide-range of biological functions can be expected to provide molecular  
457 intersections between the two processes.

458

459 Using an unbiased, multiplexed proteomics approach to examine the protein  
460 neighborhoods of membrane-bound ribosomes, we identified over 200 proteins in the  
461 HEK293 reporter model, many of which clustered into discrete functional categories.  
462 Importantly, each of the four tested ER ribosome interactor-BioID reporters had unique  
463 sets of interacting proteins, which is consistent with proteins being enriched in functional  
464 domains of the ER membrane. In agreement with published structural data, our proximity  
465 proteomics study revealed SEC61 $\beta$  to interact with other members of the SEC61  
466 translocon, including SEC61 $\alpha$  and SEC63. Remarkably, we also discovered SEC61 $\beta$  to  
467 interact with 143 (n=145 proteins, total) other proteins, making it the largest interactome  
468 identified by our study. Despite its large size, gene ontology analysis of the SEC61 $\beta$   
469 interactome yielded a strong enrichment for membrane and transport proteins, which  
470 parallels SEC61 $\beta$ 's primary role in secretory/membrane protein biogenesis. While our list  
471 of SEC61 $\beta$ -BirA protein interactors have functions that converge on those expected of  
472 the translocon, our analysis also provides new candidate interacting proteins that may  
473 function alongside SEC61 $\beta$ ; and by extension, suggests alternative mechanisms for  
474 mRNA translation via the SEC61 translocon.

475

476 Similarly, we characterized the protein interactome of the ER-resident protein, RPN1,  
477 which is a subunit of the OST complex and an accessory component of the translocon



478 (Harada et al., 2009; Kreibich et al., 1978b; Nilsson and von Heinje, 1993; Wild et al.,  
479 2018). In contrast to SEC61 $\beta$ , the high-confidence RPN1 interactome was limited,  
480 comprising 13 proteins, making it the smallest interactome identified by our study.  
481 Nonetheless, we found RPN1 to interact with SSR1/TRAP $\alpha$  and SSR3/TRAP $\gamma$ , which has  
482 been previously structurally validated (Nilsson et al., 2003; Pfeffer et al., 2014). Members  
483 of the OST complex, as well as 60S ribosomal proteins, were also among the list of RPN1  
484 interactors, which is consistent with the spatial assignment of RPN1 and its function in N-  
485 linked glycosylation and ribosome binding, respectively. While we did not pursue the  
486 direct functional relationship between these proteins and RPN1, our data provides a new  
487 platform for studying dynamic regulation of mRNA translation by the OST complex.

488

#### 489 ***The SEC62 interactome is functionally diverse***

490 The ER-localized members of the SEC gene family have been extensively studied via  
491 genetic and biochemical approaches, revealing how Sec61p, Sec62p and Sec63p  
492 interact with one another and operate collectively to support translocation of membrane  
493 and secretory proteins (Deshaies et al., 1991; Lang et al., 2012; Linxweiler et al., 2017).  
494 While these studies have advanced our understanding of the SEC61 translocon and the  
495 biological functions of SEC62 and SEC63 in protein translocation, how these proteins  
496 interact with the translation machinery, particularly in mammalian cells, has only recently  
497 gained attention (Jadhav et al., 2015; Muller et al., 2010). Our system identified SEC62  
498 to interact with 50 proteins. Unexpectedly, the SEC62 interactome was enriched for ER  
499 luminal proteins, including BiP, GRP94, PDI, and PRDX4. Identifications of these  
500 interactions by both TMT-multiplexed and single reporter proteomics analyses confirmed

501 that the SEC62-BirA reporter has the appropriate orientation at the ER membrane.  
502 Moreover, noting that these interactions were not identified in the three other BioID  
503 reporters examined, we conclude that these are likely *bona fide* interactions. The existing  
504 literature on cytoplasmic and nuclear localizations of ER luminal chaperones such as  
505 calreticulin and BiP (Afshar et al., 2005; Duriez et al., 2008; Halperin et al., 2014; Shaffer  
506 et al., 2005), along with the recent identification of an ER lumen protein reflux pathway  
507 (Igbaria et al., 2019), provide key evidence for a retrograde trafficking pathway for ER  
508 luminal proteins across the ER membrane and suggest that SEC62 may functionally  
509 intersect with such processes. Further study is needed, however, to understand the  
510 molecular basis for the observed SEC62-ER luminal protein interactions.

511  
512 Surprisingly, the SEC62 interactome also includes proteins functioning in cell-cell  
513 adhesion, vesicle transport, signaling pathways, and cytoskeleton formation, indicating  
514 that SEC62 may have functions independent of protein biogenesis. For example, SEC62  
515 may be important for ER tubule organization and protein transport to the Golgi apparatus.  
516 Interestingly, our data also suggests that SEC62 may have a critical role in multiple  
517 signaling pathways. To date, the best characterized ER signaling pathway is the Unfolded  
518 Protein Response (UPR). In the UPR, the accumulation of misfolded proteins at the ER  
519 triggers a signaling cascade that includes transcriptional (e.g. ATF6) upregulation of ER  
520 chaperones (e.g. BiP, protein disulfide isomerases (PDI), GRP94), and ERAD  
521 components – which are all represented in our list of interactors. We also found SEC62  
522 to interact with proteins that function in the Wnt and Notch signaling pathways, which are  
523 less commonly studied in the context of ER regulation, though it has been reported that

524 Wnt signaling proteins are retained in the ER due to inefficient secretion (Burrus and  
525 McMahon, 1995; Moti et al., 2019). To this point, the ER-resident glycoprotein, Oto,  
526 regulates Wnt activity by binding Wnt1 and Wnt3a to facilitate its retention in the ER  
527 (Zoltewicz et al., 2009). Whether SEC62 acts as another ER-resident protein that binds  
528 Wnt-related factors to regulate the accumulation and burst of Wnt ligands remains to be  
529 determined. Similarly, our data suggests that SEC62 may play a role in the glycosylation  
530 process of Notch proteins, thereby influencing Notch activation. Understanding how  
531 SEC62 may function in the UPR, Notch, and/or Wnt signaling pathways has the potential  
532 to shed new light on how defects in these signaling cascades at the ER contributes to  
533 genetic human disorders.

534

### 535 ***A role for LRRC59 in the spatial organization of protein synthesis on the ER***

536 Despite the discovery of LRRC59 decades ago, little is known about its biological function  
537 (Hoffman et al., 2019; Ichimura, 1992; Ichimura et al., 1993; Ohsumi et al., 1993;  
538 Tatematsu et al., 2015; Xian et al., 2020). Early sequence analysis revealed that the  
539 cytoplasmic domain of LRRC59 contains a number of intriguing structural features,  
540 including leucine-rich repeats (LRR), which are known protein-protein interaction motifs,  
541 hydrophilic regions (KRE), and several regions of charged residues that could serve as  
542 sites for protein-protein interactions and ribosome binding activity (Ichimura, 1992;  
543 Ohsumi et al., 1993). Indeed, via proximity proteomics, we identified high-confidence  
544 interactions with 25 proteins. Importantly, these interactions are likely occurring on the  
545 cytosolic domain of LRRC59, as predicted, since the reporter construct places the BirA  
546 terminal to the LRR, KRE, and transmembrane-spanning domains (**Supplemental**

547 **Figure 1A**). Prominent in the LRRC59 interactome were subunits of the SRP (e.g.  
548 SRP54, SRP72, SRP68), translation initiation factors (e.g. eIF2A, eIF5, DHX29), and  
549 other ER-RBPs (e.g. SERBP1, MTDH). The prevalence of these interactions link LRRC59  
550 to the regulation of secretory and membrane protein synthesis on the ER. In support of  
551 this view, we recently demonstrated that LRRC59-BirA constructs robustly label ER-  
552 bound ribosomes (Hoffman et al., 2019), and previous *in vitro* studies demonstrated that  
553 LRRC59 binds the 60S ribosomal subunit (Ichimura, 1992; Ohsumi et al., 1993).

554

555 Here, we propose six possible mechanisms by which LRRC59 may regulate mRNA  
556 translation on the ER membrane (**Figure 7**). First, given the enrichment of SRP subunits  
557 in both our BioID and co-IP experiments, LRRC59 may directly interact with the SRP  
558 receptor (**Figure 7A**) and/or SRP (**Figure 7B**) to recruit mRNA/ribosome/nascent peptide  
559 complexes to the ER membrane for continued mRNA translation. Alternatively, LRRC59  
560 may bind translationally active ribosomes via protein-protein interactions occurring on its  
561 large LRR- and KRE-containing cytoplasmic domain (**Figure 7C**). Given the enrichment  
562 of translation initiation factors interacting with LRRC59, our data also suggests that  
563 LRRC59 may bind both 60S and 40S ribosomal subunits, as well as initiation factors in  
564 proximity to facilitate mRNA translation initiation on the ER membrane (**Figure 7D**).  
565 Another possible mechanism for a LRRC59 function in mRNA translation is via directly  
566 binding mRNA (Hsu et al., 2018) and/or indirectly targeting mRNAs through interactions  
567 with ER-localized RBPs (**Figure 7E**). By anchoring localized mRNAs either directly or  
568 indirectly, LRRC59 may then recruit ribosomes (as previously postulated) for subsequent  
569 mRNA translation (**Figure 7E**). Finally, our data also reveal LRRC59 to interact with

570 proteins that associate with stress granules (e.g. UBAP2L, PRRC2A, PRRC2C).  
571 Therefore, we hypothesize that stress granules may reside proximal to LRRC59 as a  
572 mechanism to spatially and temporally fine-tune protein synthesis upon changes in  
573 cellular homeostasis (**Figure 7F**). Although these enriched interactions are highly  
574 suggestive of a role for LRRC59 in mRNA translation regulation on the ER membrane,  
575 further studies are necessary to provide mechanistic support for these hypotheses.

576

577 In summary, we demonstrate that ER-resident proteins proximal to bound ribosomes are  
578 organized via protein network interactions. We provide evidence that SEC61 $\beta$  interacts  
579 with proteins important for secretory and membrane translocation; demonstrate that  
580 RPN1 interacts with OST complex subunits and ribosomal proteins; and propose a new  
581 function for LRRC59 in regulating mRNA translation of secretory/membrane-encoding  
582 proteins via the SRP pathway. These data also reveal an array of possible biological  
583 functions that SEC62 may facilitate, including signaling pathways, redox homeostasis,  
584 and protein folding. Together, these data offer significant insights into mechanisms of  
585 translational organization on the ER and advance understanding into the diversity of  
586 functions performed by this central organelle.

587

## 588 **Materials and Methods**

### 589 **Generation of BioID chimera and Flp-In™ T-Rex™ HEK293 cell lines**

590 BirA-chimera constructs are described in (Hoffman et al., 2019). HEK293 Flp-In™ T-  
591 REX™ cell lines were generated according to the manufacturer's instructions  
592 (ThermoFisher Scientific). BirA-containing plasmids (0.4 µg), along with the pOGG4 (4  
593 µg) plasmid were transfected into cells using 7.5 µL of Lipofectamine 3000  
594 (ThermoFisher, L3000001). All transfections were performed in 6-well culture dishes at  
595 80% confluency. Colonies were selected for between 48 hours and two weeks post-  
596 transfection using 100 µg/mL hygromycin (MediaTech, 30-240-CR, Manassas, VA) and  
597 15 µg/mL blasticidin (ThermoFisher, R21001). A negative control cell line ("Empty Vector  
598 Control") was generated by recombination of an empty vector pcDNA5-FRT/TO and  
599 antibiotic selection for an empty vector matched control.

600

### 601 **Sequential detergent fractionation and cell lysis**

602 Cells were washed twice with ice-cold PBS containing 50 µg/mL of cycloheximide (CHX)  
603 (VWR, 94271, Radnor, PA) for 3 minutes. To extract the cytosolic (C) fraction, cells were  
604 permeabilized for 5 minutes at 4°C in buffer containing 110 mM KOAc, 25 mM HEPES  
605 pH 7.2, 2.5 mM MgCl<sub>2</sub>, 0.03% digitonin (Calbiochem, 3004010), 1 mM DTT, 50 µg/mL  
606 CHX, 40 U/mL RNaseOUT (Invitrogen, 10777-019, Carlsbad, CA), and protease inhibitor  
607 complex (PIC) (Sigma Aldrich, P8340). Supernatants were collected as the cytosolic  
608 fraction, and cells were then rinsed with wash buffer (110 mM KOAc, 25 mM HEPES pH  
609 7.2, 2.5 mM Mg(OAc)<sub>2</sub>, 0.004% digitonin, 1 mM DTT, 50 µg/mL CHX, 40 U/mL  
610 RNaseOUT, and PIC). To extract the membrane (M) fraction, the washed cells were then

611 lysed for 5 minutes at 4°C in 400 mM KOAc, 25 mM HEPES pH 7.2, 15 mM MgCl<sub>2</sub>, 1%  
612 NP-40, 0.5% DOC, 1 mM DTT, 50 µg/mL CHX, 40 U/mL RNaseOUT, and PIC.  
613 Subcellular fractions were cleared by centrifugation (15,300 x g for 10 minutes). Total cell  
614 lysis was performed by incubating cells at 4°C for 10 minutes in membrane lysis buffer  
615 (as listed above), followed by centrifugation at 15,300 x g for 10 minutes.

616

### 617 **BirA labeling of microsomes**

618 Canine pancreas rough microsomes (RM) (Walter and Blobel, 1980) were adjusted to a  
619 concentration of 4 mg/mL in 500 µL of BirA reaction buffer (20 mM Tris pH 8, 5 mM CaCl<sub>2</sub>,  
620 100 mM KCl<sub>2</sub>, 10 mM MgCl<sub>2</sub>, 3 mM ATP, 1.5 mM biotin, 5 mM phosphocreatine (Sigma-  
621 Aldrich, P7936-1G), and 5 µg/mL of creatine kinase (Sigma-Aldrich, C3755-3.5KU)).  
622 Purified recombinant BirA\*-GST fusion protein was added at a concentration of 10 µg/mL.  
623 Following 0, 1, 3, 6, and 18 hours, 100 µL of reaction was removed, flash frozen in a dry  
624 ice/ethanol bath, and stored at -80°C for subsequent analysis.

625

### 626 **Immunoblotting**

627 Protein lysate concentrations were determined using a Pierce BCA Protein Assay Kit  
628 (ThermoFisher, 23225). Proteins were resolved by SDS-PAGE in 12% acrylamide gels  
629 containing 0.5% of trichloroethanol. Gels were UV irradiated for 5 minutes and imaged  
630 using an Amersham Imager 600 (GE Life Sciences). Gels were then equilibrated in Tris-  
631 glycine transfer buffer for 5 minutes and transferred onto nitrocellulose membranes.  
632 Membranes were blocked in 3% BSA and probed for BirA (Abcam, ab14002),  
633 Streptavidin-RD680 (Li-Cor, P/N 925-68079; 1:20,000), TRAPα (Migliaccio et al., 1992),

634 or GRP94 (Jagannathan et al., 2011). Membranes were incubated with isotype-matched  
635 secondary antibodies (Li-Cor, Lincoln, NE; 1:10,000), and imaged by infrared  
636 fluorescence detection using the Odyssey Clx (Li-Cor), where signal intensities were  
637 quantified by densitometry analyses. To examine total protein levels, immunoblots were  
638 stained with either India Ink or Ponceau S solution (Sigma-Aldrich).

639

#### 640 **Protease protection assay**

641 The SEC62-BirA construct was expressed overnight as reported in (Hoffman et al., 2019).  
642 Cultures were then placed on ice, permeabilized in digitonin-supplemented cytosolic  
643 buffer (as described above), rinsed, and incubated with cytosolic buffer containing 0, 25,  
644 or 50 µg/mL of Proteinase K (Bioline) for 30 minutes at 4°C. Protease digestions were  
645 quenched by addition of 0.5 mM PMSF. Cell extracts were prepared and immunoblots  
646 performed as above.

647

#### 648 **TMT/Isobaric tag mass spectrometry**

649 ***Sample preparation and proteolytic digestion.*** Three biological replicates from each  
650 reporter cell line were affinity isolated on streptavidin magnetic beads, eluted in 120 µL of  
651 biotin elution buffer (2% SDS, 20 mM biotin, 2 M thiourea, 0.5 M Tris unbuffered), and  
652 prepared according to the standard S-Trap digestion protocol (Protifi, Inc.; (Yang et al.,  
653 2018)). Briefly, each sample was loaded onto its respective S-Trap column, washed four  
654 times with S-trap binding buffer (90% MeOH, 100 mM TEAB), and digested by adding 0.8  
655 µg of sequencing grade trypsin to the top of each S-trap tip with incubation for one hour  
656 at 47°C. The peptides were eluted from the S-trap tip first with 50 mM TEAB, then with



657 0.2% aqueous formic acid, and finally with 50% acetonitrile in 0.2% aqueous formic acid.  
658 The peptide elutions were combined and dried via SpeedVac. Peptide yield from each  
659 sample was determined to be approximately 20 µg based on BCA Protein Assay  
660 (ThermoFisher Scientific).

661

662 **TMT labeling.** Dried samples, determined to contain approximately 22 µg of digested  
663 peptide each, were brought to room temperature and resuspended in 70 µL 200 mM  
664 TEAB. An aliquot (20 µL) from each of the 15 samples was combined to make a Study  
665 Pool QC (SPQC). TMT reagents (TMT10Plex plus TMT11-131C, Product A37725) were  
666 dissolved in 45 µL acetonitrile for 5 minutes with vortexing. Labeling reagent (20 µl) was  
667 added to each sample for 2 hours at room temperature. Sample labeling was then  
668 quenched with 4 µL of 5% v/v hydroxylamine in 200 mM TEAB for 15 minutes. The TMT  
669 samples for each set were combined into a 1.5 mL Eppendorf tube, acidified to 1.0%  
670 formic acid, frozen, and lyophilized to dryness overnight.

671

672 **Pre-fractionation.** Each TMT labeled peptide set was fractionated to improve depth of  
673 proteome coverage using a Pierce High pH Reversed-Phase Peptide Fractionation Kit  
674 (ThermoFisher Scientific, Part 84868). The fractionation was performed according to the  
675 manufacturer's protocol and yielded 8 peptide fractions for analysis. Water/acetonitrile  
676 mixtures with 0.1% v/v triethylamine (TEA), pH 10, were used for reversed-phase  
677 fractionation. 5% v/v wash was used to remove excess TMT reagent, then fractions were  
678 collected at 10, 12.5, 15, 17.5, 20, 22.25, 25, and 50% v/v MeCN. These fractions were

679 independently acidified to 1% formic acid and dried via SpeedVac. Samples were  
680 subsequently resuspended in 22  $\mu$ L 1/2/97 v/v/v TFA/MeCN/water.

681  
682 **Liquid chromatography – tandem mass spectrometry.** Approximately 1  $\mu$ g of TMT-  
683 labeled peptide from each fraction was analyzed by nanoscale liquid chromatography –  
684 tandem mass spectrometry (LC-MS/MS) on a nanoAquity UPLC (Waters) coupled to an  
685 Orbitrap Fusion Lumos Tribrid mass spectrometer (ThermoFisher Scientific). Peptides  
686 were first trapped on a column at 99.9% water and 5  $\mu$ L/min, followed by separation at  
687 0.4  $\mu$ L/min on an analytical column (Waters Corporation) with a gradient from 3 to 30%  
688 MeCN (0.1% formic acid) over 90 minutes. Column eluent was introduced to the MS via  
689 electrospray ionization (+2.1kV) and a source temperature of 275°C. Upon easy-IC  
690 internal mass calibration, tandem MS sequencing and quantification was performed using  
691 a full-scan spectrum at 120k resolution, followed by MS2 sequencing at 50k resolution  
692 with HCD fragmentation at 38 V. MS/MS was performed with an isolation width of 0.7 Da,  
693 a cycle time of 1 second until the next full scan spectrum, and 60 seconds dynamic  
694 exclusion. Raw data and \*.mgf peaklist files for this study have been uploaded to the  
695 MASSive data repository and are available at (<https://massive.ucsd.edu/>).

696  
697 **TMT-labeled MS data processing.** Raw MS data  
698 (<ftp://massive.ucsd.edu/MSV000085009/>) was converted to \*.mgf format using Proteome  
699 Discoverer v2.1 (ThermoFisher Scientific) and submitted to Mascot v2.5 (Matrix Sciences,  
700 Inc.) for database searching. Peptide matching included 5 ppm precursor and 0.02 Da  
701 product ion tolerance, fixed carbamidomethyl (C), along with variable modifications

702 TMT10 (N-term, K) and deamidation (N, Q). Searches were performed against the  
703 curated human proteome ([www.uniprot.org](http://www.uniprot.org)), plus common contaminant sequences such  
704 as ALBU\_BOVIN, ADH1\_YEAST, ENO1\_YEAST, and BIRA\_ECOLI. A reverse-  
705 sequence decoy database was appended for False Discovery Rate (FDR) determination.  
706 Scaffold Q+ v4.8.5 (Proteome Software, Inc.) was used to quantify TMT-label based  
707 peptide and protein identifications. Peptide identifications were accepted if they could be  
708 established at greater than 50.0% probability by the Scaffold Local FDR algorithm, while  
709 protein identifications were accepted if they could be established at greater than 99.9%  
710 probability and contained at least 1 identified peptide. Protein probabilities were assigned  
711 by the Protein Prophet algorithm (Nesvizhskii et al., 2003). TMT reporter ion channels  
712 were corrected based on isotopic purity in all samples according to the algorithm  
713 described in i-Tracker (Shadforth et al., 2005). Normalization was performed iteratively  
714 (across samples and spectra) on intensities, as described in (Oberg et al., 2008). Spectra  
715 data were log-transformed, pruned of those matched to multiple proteins and those  
716 missing a reference value, and weighted by an adaptive intensity weighting algorithm.  
717 Relative protein abundance across the experiment was expressed as the  $\log_2$  ratio to the  
718 reference (SPQC) channel average for all samples (**Supplemental File S1**). Percent  
719 missing values were calculated at the protein level for the SPQC channels, as well as all  
720 channels. A  $p$ -value using a Student's t-test was then calculated comparing each  
721 biological group (n=3) versus the SPQC (n=6).

722

723 **Identification of interaction networks.** A combination of statistical prioritization, 2D  
724 clustering, and principal components analysis (PCA) was used to identify putative

725 interaction networks from the dataset. The data were curated such that proteins only  
726 quantified in one TMT set, or missing in more than 40 of the total channels were excluded  
727 from consideration (86 of 1,263 proteins). A  $p$ -value was then calculated using a Student's  
728 t-test between each BirA-fusion sample group ( $n=3$ ) and the SPQC group ( $n=6$ ) to  
729 determine whether a protein was statistically different in each biological group (BirA  
730 reporter) from the average of all groups (SPQC). Proteins that did not pass a Bonferroni-  
731 corrected  $p$ -value  $< 0.1$  (raw  $p$ -value  $< 1e-4$ ) were removed, yielding 353 proteins as  
732 putative interactors (**Supplemental File S2**). Finally, putative interaction networks were  
733 identified using unbiased 2D hierarchical clustering (Robust, Ward's Method) in JMP 14.0  
734 (SAS Institute, Cary NC). The clustering analysis only included the BirA interactome  
735 samples (not the SPQC samples) in order to reduce the potential for cluster mis-  
736 assignment.

737

### 738 **Label-free proteomic analysis of BioID proteomes**

739 **Sample preparation.** For single BioID reporter studies, reporter cell culturing, reporter  
740 expression, cell fractionation, detergent lysis, and affinity isolation of biotinylated proteins  
741 was performed as above. Samples were subjected to one dimensional SDS-PAGE. 25  
742  $\mu$ L of sample was combined with 5  $\mu$ L of 100 mM DTT and 10  $\mu$ L of NuPAGE™  
743 (ThermoFisher Scientific) 4X loading buffer, and samples were then heated to 70°C for  
744 ten minutes with shaking. SDS-PAGE separation was performed using 1.5 mm 4-12%  
745 Bis-Tris pre-cast polyacrylamide gels (Novex, ThermoFisher Scientific) and 1X MES SDS  
746 NuPAGE™ Running Buffer (ThermoFisher Scientific), including NuPAGE™ antioxidant.  
747 SDS-PAGE separation was performed at a constant 200V for five minutes, gels fixed for

748 10 minutes, stained for 3 hours, and destained overnight following manufacturer  
749 instructions.

750

751 ***Gel band isolation and trypsin digestion.*** Gel bands of interest were isolated using a  
752 sterile scalpel, transferred to protein LoBind tubes (Eppendorf), and minced. Gel pieces  
753 were washed with 500  $\mu$ L of 40% LCMS grade acetonitrile (MeCN, ThermoFisher  
754 Scientific) in AmBic, with shaking at 30°C. Gel pieces were shrunk with LCMS grade  
755 MeCN, the solution discarded, and the gel pieces dried at 50°C for 3 min. Reduction of  
756 disulfides was performed using 100  $\mu$ L of 10 mM DTT at 80°C for 30 min with shaking,  
757 followed by alkylation with 100  $\mu$ L of 55 mM IAM at room temperature for 20 min. This  
758 liquid was aspirated from the samples and gel pieces were washed twice with 500  $\mu$ L  
759 AmBic. LCMS grade MeCN was added to shrink the gel pieces in each sample, then  
760 samples were swelled in AmBic, and this process was repeated. The gel pieces were  
761 shrunk a final time by adding 200  $\mu$ L of LCMS grade MeCN, and heating for 3 min at 50°C  
762 to promote evaporation. Trypsin digestion was performed by addition of 30  $\mu$ L of 10 ng/ $\mu$ L  
763 sequencing grade trypsin (Promega, Madison, WI) in AmBic followed by 30  $\mu$ L of  
764 additional AmBic. The samples were incubated overnight at 37°C with shaking at 750  
765 rpm. Following overnight digestion, 60  $\mu$ L of 1/2/97 v/v/v TFA/MeCN/water was added to  
766 each sample and incubated for 30 min at room temperature and 750 rpm to extract  
767 peptides, and the combined supernatant was transferred to an autosampler vial (Waters).  
768 Gel pieces were shrunk in 50  $\mu$ L additional MeCN for 10 min to extract the maximum  
769 number of peptides, and combined with the previous supernatant. The samples were  
770 dried in the Vacufuge (Eppendorf) and stored at -80°C.

771

772 **Qualitative analysis of gel electrophoresis samples.** All gel band samples were  
773 resuspended in 20  $\mu$ L of 1/2/97 v/v/v TFA/MeCN/water and analyzed by nanoLC-MS/MS  
774 using a Waters nanoAcquity LC interfaced to a Thermo Q-Exactive Plus via a  
775 nanoelectrospray ionization source. 1  $\mu$ L of each gel band sample was injected for  
776 analysis. Each sample was first trapped on a Symmetry C18, 300  $\mu$ m x 180 mm trapping  
777 column (5  $\mu$ L/min at 99.9/0.1 v/v H<sub>2</sub>O/MeCN for 5 minutes), after which the analytical  
778 separation was performed using a 1.7  $\mu$ m ACQUITY HSS T3 C18 75  $\mu$ m x 250 mm  
779 column (Waters). The peptides were eluted using a gradient of 5-40% MeCN with 0.1%  
780 formic acid at a flow rate of 400 nL/min with a column temperature of 55°C for 90 minutes.  
781 Data collection on the Q Exactive Plus mass spectrometer was performed with data  
782 dependent acquisition (DDA) MS/MS, using a 70,000 resolution precursor ion (MS1) scan  
783 followed by MS/MS (MS2) of the top 10 most abundant ions at 17,500 resolution. MS1  
784 was performed using an automatic gain control target of 1e6 ions and maximum ion  
785 injection (max IT) time of 60 ms. MS2 used AGC target of 5e4 ions, 60 ms max IT time,  
786 2.0 m/z isolation window, 27 V normalized collision energy, and 20 s dynamic exclusion.

787

788 **Single reporter MS data processing.** Database searching was performed as described  
789 by TMT-labeled MS data processing. For single reporters, data was searched using  
790 trypsin enzyme cleavage rules and a maximum of 4 missed cleavages, fixed modification  
791 carbamidomethylated cysteine, variable modifications biotinylated lysine, deamidated  
792 asparagine and glutamic acid, and oxidized methionine. The peptide mass tolerance was  
793 set to +/- 5 ppm and the fragment mass tolerance was set to +/- 0.02 Da. False discovery

794 rate control for peptide and protein identifications was performed using Scaffold v4  
795 (Proteome Software, Inc.) (**Supplemental File S3**).

796

### 797 **Native LRRC59 immunoprecipitation and mass spectrometry**

798 **Sample preparation.** Caco-2 cells were cultured according to ATCC recommendations  
799 and processed at ca. 90% confluence. Cell extracts were prepared by addition of 0.5 mL  
800 per 15 cm plate of NP-40 lysis buffer (1% NP-40, 100 mM KOAc, 50 mM HEPES pH 7.2,  
801 2 mM Mg(OAc)<sub>2</sub>, PIC, 1 mM DTT). Lysates were maintained on ice for 20 minutes and  
802 cleared by centrifugation (10,000 x g, 10 minutes). The supernatant fractions were diluted  
803 1:1 in dilution buffer (50 mM HEPES, 100 mM KOAc, 2 mM Mg(OAc)<sub>2</sub>, PIC, 1 mM DTT)  
804 and supplemented with 5 µg/mL of LRRC59 antibody (A305-076A, Bethyl Labs,  
805 Montgomery TX) or rabbit IgG (Sigma-Aldrich, St. Louis, MO). Samples were incubated  
806 with end-over-end rotation overnight at 4°C. Dynabead Protein G beads (ThermoFisher,  
807 Waltham MA) were added to a concentration of 30 µL/mL and rotated for 2 hours at 4°C.  
808 Beads were washed 3x in buffer 1 (0.1% NP-40, 100 mM KOAc, 50 mM HEPES pH 7.2,  
809 2 mM Mg(OAc)<sub>2</sub>, PIC, 1 mM DTT), 1x in buffer 2 (0.1% NP-40, 500 mM KOAc, 50 mM  
810 HEPES pH 7.2, 2 mM Mg(OAc)<sub>2</sub>, PIC, 1 mM DTT), and 1x in PBS. Proteins were eluted  
811 in an equi-bead volume of 2x Laemmli buffer by heating at 70°C for 20 minutes and  
812 submitted for mass spectrometry analysis.

813

814 **LRRC59-IP data analysis.** Raw MS data (.sf3 files) were processed using Scaffold 4  
815 Proteome Software (Proteome Software, Inc.) to obtain total spectral counts for each  
816 sample. Protein interactors of LRRC59 and IgG (control) were then determined by

817 performing *CompPASS* (Sowa et al., 2009), which is an unbiased, comparative  
818 proteomics analysis. Any prey in each IP with a D-score greater than or equal to one was  
819 considered to be a high-confidence interacting protein (**Supplemental File S4**).

820

## 821 **Bioinformatic analyses**

822 **Gene Ontology.** GO analyses were performed using the Cytoscape application, BiNGO  
823 (Maere et al., 2005), with a Benjamini and Hochberg FDR correction (significance level  
824 of 0.05) to enrich for terms after multiple testing correction. A custom set of genes  
825 expressed in our multiplexed BioID experiment was used as background for examination  
826 of SEC62-BirA and LRRC59-BirA interactors, while the entire human annotation  
827 (provided within the application) was used as a reference background for LRRC59  
828 interactors determined by native IP. Additional functional information (as depicted by the  
829 heatmaps/matrices and protein color-coding) was extracted by batch querying each set  
830 of protein interactors against the MGI (Bult et al., 2019; Krupke et al., 2017; Smith et al.,  
831 2019) and STRING (Szklarczyk et al., 2019; Szklarczyk et al., 2017) databases.

832

833 **Protein-Protein Interaction Networks.** Protein-protein interaction analyses of SEC62-  
834 BirA (n=50) and LRRC59-BirA (n=25) interactors were performed using the STRING  
835 database (Szklarczyk et al., 2019; Szklarczyk et al., 2017). Only experimentally  
836 determined interactions and those reported from a curated database were considered.

837

838 **Identification of membrane proteins.** The list of SEC62-BirA interactors (n=50) was  
839 intersected with a membrane protein annotation file downloaded from the MembranOME



840 database (Lomize et al., 2018; Lomize et al., 2017). Of the 50 SEC62-interacting proteins,  
841 21 (42%) were identified as membrane proteins. Membrane protein classification was  
842 validated by manually searching each of the 50 proteins against The Human Protein Atlas  
843 (Uhlen et al., 2015; Uhlen et al., 2010).

844

845 **Acknowledgements**

846 We thank the Duke University School of Medicine Proteomics and Metabolomics Shared  
847 Resource for their invaluable proteomics services, along with members of the Nicchitta  
848 laboratory, in particular Jessica Childs, Jason Arne, and JohnCarlo Kristofich, for their  
849 helpful feedback on this project. This work was supported by NIH grant GM101533 to  
850 C.V.N. The authors declare no competing financial interests.

851

852 **Author Contributions**

853 Conceptualization and experimental design: A.M. Hoffman and C.V. Nicchitta;  
854 Investigation, formal analysis, and visualization: M.M. Hannigan, A.M. Hoffman, C.V.  
855 Nicchitta, J.W. Thompson, T. Zheng; Writing – original draft: M.M. Hannigan and C.V.  
856 Nicchitta; Writing – review and editing: A.M. Hoffman, J.W. Thompson; Funding  
857 acquisition, project administration, and supervision: C.V. Nicchitta,

858

## Figure Legends

### Figure 1. Identification of ER membrane protein interactomes by proximity

**proteomics. (A)** Schematic of known (SEC61 translocon, OST complex), and candidate (SEC62, LRRC59) ER-ribosome receptors. SEC61 $\beta$  (purple), a subunit of the SEC61 translocon, RPN1 (green), a subunit of the OST complex, SEC62 (orange), and LRRC59 (blue) are expressed as BiOD chimeras, labeling interacting and near-neighbor proteins (indicated by starred ribosomes and proteins W, X, Y, and Z). **(B)** Left panel: Streptavidin blots examining the subcellular distribution of biotin-labeled proteins within HEK293 cells expressing either the LRRC59-, SEC62-, SEC61 $\beta$ -, or RPN1-BirA reporter constructs. Biotin labeling (doxycycline (dox)-inducible expression of reporters) was performed over a time course spanning 0-6 hours and cytosol (C) and membrane (M) extracts prepared by detergent fractionation. Right panel: Densitometric quantifications of biotin labeling intensities for cytosolic and membrane fractions. **(C)** Canine pancreas rough microsomes with (+BirA) or without (-BirA) the addition of BirA\* in *trans*. Biotin labeling of proteins was conducted over 0-18 hours (top, left). Biotin labeling intensities were quantified using densitometric analyses (top, right). As a loading control, total protein lysate was analyzed by India ink staining (bottom, left) and quantified by densitometric analysis (bottom, right).

### Figure 2. Proximity proteomics reveals unique interactomes for each of the four

**tested baits. (A)** Schematic of the experimental approach. BirA-reporters for known (SEC61 $\beta$  (purple), RPN1 (green)) and candidate (SEC62 (orange), LRRC59 (blue)) ER-resident ribosome interacting proteins were expressed with biotin labeling (3 hours) conducted in biological triplicate. An empty vector negative control (red) was included.

Samples were digested, tandem mass tag (TMT) labeled, and combined for liquid chromatography-tandem mass spectrometry (LC-MS/MS) analysis. Enrichment analyses of biotin-labeled proteins will reveal protein-protein interactions and/or functional networks for each of the five baits. **(B)** Violin plots of the protein abundance distributions for all biotin-labeled proteins (n=1,263) for each bait. **(C)** Clustered heatmap showing the average log<sub>2</sub>FC (across biological replicates) for each of 1,263 identified proteins per bait (green represents enriched protein abundance; red indicates decreased protein abundance). Boxplots showing the enrichment of highly enriched proteins (prey) labeled in the **(D)** SEC61 $\beta$ , **(E)** RPN1, **(F)** SEC62, and **(G)** LRRC59 BioID reporter studies. Each dot represents the log<sub>2</sub> FC value per biological replicate.

**Figure 3. Characterization of protein networks for known ribosome interactors, SEC61 $\beta$  and RPN1.** **(A)** Comparison of protein abundance for the 353 identified putative interactors in SEC61 $\beta$ -BirA and empty vector control HEK293 cells. Purple dots represent enriched, high-confidence interactors. Gray dots represent proteins that are less likely *bona fide* interactors of SEC61 $\beta$ -BirA. **(B)** Enriched Gene Ontology (GO) terms associated with high-confidence SEC61 $\beta$ -BirA interactors. Dark purple, purple, and light purple bars represent membrane-, endoplasmic reticulum (ER)-, and protein transport-related GO enriched terms, respectively. **(C)** Protein-protein interactions (PPI) among high-confidence SEC61 $\beta$ -BirA interactors, based on STRING annotations. Pink and cyan edges indicate experimentally determined and curated interactions, respectively. **(D)** Comparison of protein abundance for the identified 353 putative interactors in RPN1-BirA and empty vector control HEK293 cells. Green dots represent enriched, high-confidence

proteins that interact with RPN1-BirA. Gray dots represent proteins that are less likely *bona fide* interactors of RPN1-BirA. **(E)** PPI network among high-confidence RPN1-BirA interactors, based on STRING annotations. **(F)** Functional comparison of all 13 high-confidence RPN1-BirA interactors, based on STRING annotations.

**Figure 4. BioID-SEC62 labels functionally diverse proteins.** **(A)** Comparison of protein abundance for the 353 identified putative interactors in SEC62-BirA and empty vector control HEK293 cells. Orange dots represent enriched, high-confidence proteins that interact with SEC62-BirA. Gray dots represent proteins that are less likely *bona fide* interactors of SEC62-BirA. **(B)** Hierarchical view of relationships for GO terms associated with SEC62 high-confidence protein interactors. GO term circles are outlined to match the colors assigned to each enriched GO category, as indicated beneath the panel. Circle sizes represent the number of genes in each enriched term, whereas circle color indicates the GO enrichment *p*-value. **(C)** Clustering of SEC62 high-confidence interactors based on co-occurrence of functional annotations. The left-most heatmap represents protein abundance values across biological replicates in control and SEC62-BirA HEK293 cells. **(D)** Protein-protein interactions (PPI) among high-confidence SEC62-BirA interactors, based on STRING annotations. Proteins are color-coded to match their functional assignment, as indicated above the panel. **(E)** Topology analysis of SEC62-BirA reporter line. SEC62-BirA cultures were chilled on ice, permeabilized with a digitonin-supplemented cytosol buffer, and subjected to digestion with the indicated concentrations of Proteinase K for 30 min on ice. Cells were subsequently lysed and total protein was resolved via SDS-PAGE (top panel). Following transfer, membranes were probed for

GRP94 (ER-luminal protein), TRAP $\alpha$  (ER-resident protein with cytosolically-disposed antibody epitope), and BirA (BioID-SEC62 reporter). Lanes 1, 2, and 3 represent digestions with 0, 25, and 50  $\mu\text{g/ml}$  proteinase K, respectively.

**Figure 5. BioID-LRRC59 interacts with SRP pathway, translation machinery, and RNA-binding proteins. (A)** Comparison of protein abundance for the 353 identified putative interactors in LRRC59-BirA and empty vector control HEK293 cells. Blue dots represent enriched, high-confidence proteins that interact with LRRC59-BirA. Gray dots represent proteins that are less likely *bona fide* interactors of LRRC59-BirA. **(B)** Enriched Gene Ontology (GO) terms associated with high-confidence LRRC59-BirA interactors. Genes assigned to each enriched GO term are listed on the right. **(C)** Clustering of LRRC59 high-confidence interactors based on co-occurrence of functional annotations. The left-most heatmap represents protein abundance values across biological replicates in control and LRRC59-BirA HEK293 cells. Protein-protein interaction (PPI) networks among LRRC59 interacting proteins, as annotated by STRING, are visualized by pink and/or cyan edges. **(D)** Alternative view of PPI networks among LRRC59 high-confidence interacting proteins, based on STRING annotations.

**Figure 6. LRRC59 co-IP screen for direct interactions with SRP pathway, translation machinery, and RNA-binding proteins. (A)** Comparison of D- and Z-scores, as determined by CompPASS analysis, for all proteins identified to interact with LRRC59 (blue) and IgG (control; gray) via immunoprecipitation (IP). Each dot is one of the 2,678 proteins identified by mass spectrometry. **(B)** Number and overlap of enriched, high-

confidence interactors of LRRC59, as determined by co-IP (dark blue) or isobaric tagging (BioID; light blue) approaches. **(C)** Number and overlap of high-confidence interactors (D-score  $\geq 1$ ) of LRRC59 (dark blue) or IgG (red), as determined by co-IP. **(D)** Enriched Gene Ontology (GO) terms associated with high-confidence LRRC59 interactors (dark blue, left) or IgG interactors (red, right). **(E)** Comparison of D- and Z-scores for each of the 25 LRRC59-interacting proteins, as determined by the BioID approach.

**Figure 7. Model depicting LRRC59 interactions with ER localized mRNA translation.**

Proximity proteomics revealed LRRC59 to significantly interact with SRP factors, translation machinery (including the ribosome), RNA-binding proteins (RBPs), and proteins associated with stress granules. As depicted, LRRC59 may interact with the **(A)** SRP receptor or **(B)** SRP to recruit translationally-engaged ribosomes to the ER membrane for continued mRNA translation. **(C)** LRRC59 recruits mRNA/ribosome/nascent peptide complexes by directly interacting with associated translation factors and/or RBPs, independent of the SRP pathway. **(D)** LRRC59 interacts with the 40S and 60S ribosomal subunits, along with translation factors, RBPs, and mRNA to facilitate translation initiation. **(E)** LRRC59 may anchor mRNAs on the ER membrane via direct RNA binding activity and/or through interactions with other mRNA-bound RBPs, thereby recruiting nearby ribosomes for subsequent mRNA translation. **(F)** LRRC59 may interact with stress granules to fine-tune the activity of translating ribosomes in response to alterations in cellular homeostasis. The depicted modes of mRNA regulation by LRRC59 are not mutually exclusive.

**Supplemental Figure 1. Classification of BioID-chimeras and their associated interactomes.** **(A)** Schematic of BirA-containing reporter constructs. **(B)** Distribution of membrane proteins identified within the SEC62-BirA interactome, based on membranOME annotations. **(C)** Subset of enriched, high-confidence interactors of BioID-SEC61 $\beta$ , -RPN1, -SEC62, or -LRRC59, as determined by single reporter, label-free mass spectrometry analyses.

**Supplemental File. Results from Mass Spectrometry Analyses.** Excel file with results of **(S1)** identified proteins (n=1263) and **(S2)** putative protein interactors (n=353) from the isobaric/tandem mass spectrometry analyses of the multiplexed BioID reporter constructs; **(S3)** protein interactors determined by single, label-free BioID reporter mass spectrometry analyses; **(S4)** and high-confidence protein interactors (n=102) of LRRC59 as determined by mass spectrometry analyses of native LRRC59-immunoprecipitations.



## References

- Afshar, N., B.E. Black, and B.M. Paschal. 2005. Retrotranslocation of the chaperone calreticulin from the endoplasmic reticulum lumen to the cytosol. *Mol Cell Biol.* 25:8844-8853.
- Becker, T., S. Bhushan, A. Jarasch, J.P. Armache, S. Funes, F. Jossinet, J. Gumbart, T. Mielke, O. Berninghausen, K. Schulten, E. Westhof, R. Gilmore, E.C. Mandon, and R. Beckmann. 2009. Structure of monomeric yeast and mammalian Sec61 complexes interacting with the translating ribosome. *Science.* 326:1369-1373.
- Beckmann, R., C.M. Spahn, N. Eswar, J. Helmers, P.A. Penczek, A. Sali, J. Frank, and G. Blobel. 2001. Architecture of the protein-conducting channel associated with the translating 80S ribosome. *Cell.* 107:361-372.
- Bellon, A., A. Iyer, S. Bridi, F.C.Y. Lee, C. Ovando-Vazquez, E. Corradi, S. Longhi, M. Rocuzzo, S. Strohbuecker, S. Naik, P. Sarkies, E. Miska, C. Abreu-Goodger, C.E. Holt, and M.L. Baudet. 2017. miR-182 Regulates Slit2-Mediated Axon Guidance by Modulating the Local Translation of a Specific mRNA. *Cell reports.* 18:1171-1186.
- Berkovits, B.D., and C. Mayr. 2015. Alternative 3' UTRs act as scaffolds to regulate membrane protein localization. *Nature.* 522:363-367.
- Braunger, K., S. Pfeffer, S. Shrimal, R. Gilmore, O. Berninghausen, E.C. Mandon, T. Becker, F. Forster, and R. Beckmann. 2018. Structural basis for coupling protein transport and N-glycosylation at the mammalian endoplasmic reticulum. *Science.* 360:215-219.
- Bult, C.J., J.A. Blake, C.L. Smith, J.A. Kadin, J.E. Richardson, and G. Mouse Genome Database. 2019. Mouse Genome Database (MGD) 2019. *Nucleic Acids Res.* 47:D801-D806.
- Burrus, L.W., and A.P. McMahon. 1995. Biochemical analysis of murine Wnt proteins reveals both shared and distinct properties. *Exp Cell Res.* 220:363-373.
- Chartron, J.W., K.C. Hunt, and J. Frydman. 2016. Cotranslational signal-independent SRP preloading during membrane targeting. *Nature.* 536:224-228.
- Chen, Q., S. Jagannathan, D.W. Reid, T. Zheng, and C.V. Nicchitta. 2011. Hierarchical regulation of mRNA partitioning between the cytoplasm and the endoplasmic reticulum of mammalian cells. *Mol Biol Cell.* 22:2646-2658.
- Cohen, S., A.M. Valm, and J. Lippincott-Schwartz. 2018. Interacting organelles. *Curr Opin Cell Biol.* 53:84-91.
- Cui, X.A., H. Zhang, and A.F. Palazzo. 2012. p180 promotes the ribosome-independent localization of a subset of mRNA to the endoplasmic reticulum. *PLoS Biol.* 10:e1001336.
- de Brito, O.M., and L. Scorrano. 2010. An intimate liaison: spatial organization of the endoplasmic reticulum-mitochondria relationship. *EMBO J.* 29:2715-2723.
- Debard, S., G. Bader, J.O. De Craene, L. Enkler, S. Bar, D. Laporte, P. Hammann, E. Myslinski, B. Senger, S. Friant, and H.D. Becker. 2017. Nonconventional localizations of cytosolic aminoacyl-tRNA synthetases in yeast and human cells. *Methods.* 113:91-104.

- Dejgaard, K., J.F. Theberge, H. Heath-Engel, E. Chevet, M.L. Tremblay, and D.Y. Thomas. 2010. Organization of the Sec61 translocon, studied by high resolution native electrophoresis. *J Proteome Res.* 9:1763-1771.
- Deshaies, R.J., S.L. Sanders, D.A. Feldheim, and R. Schekman. 1991. Assembly of yeast Sec proteins involved in translocation into the endoplasmic reticulum into a membrane-bound multisubunit complex. *Nature.* 349:806-808.
- Diehn, M., R. Bhattacharya, D. Botstein, and P.O. Brown. 2006. Genome-scale identification of membrane-associated human mRNAs. *PLoS Genet.* 2:e11.
- Diehn, M., M.B. Eisen, D. Botstein, and P.O. Brown. 2000. Large-scale identification of secreted and membrane-associated gene products using DNA microarrays. *Nat Genet.* 25:58-62.
- Duriez, M., J.M. Rossignol, and D. Sitterlin. 2008. The hepatitis B virus precore protein is retrotransported from endoplasmic reticulum (ER) to cytosol through the ER-associated degradation pathway. *J Biol Chem.* 283:32352-32360.
- English, A.R., and G.K. Voeltz. 2013. Endoplasmic reticulum structure and interconnections with other organelles. *Cold Spring Harb Perspect Biol.* 5:a013227.
- Gorlich, D., S. Prehn, E. Hartmann, K.U. Kalies, and T.A. Rapoport. 1992. A mammalian homolog of SEC61p and SECYp is associated with ribosomes and nascent polypeptides during translocation. *Cell.* 71:489-503.
- Goyette, J., and K. Gaus. 2017. Mechanisms of protein nanoscale clustering. *Curr Opin Cell Biol.* 44:86-92.
- Gu, W., Y. Deng, D. Zenklusen, and R.H. Singer. 2004. A new yeast PUF family protein, Puf6p, represses ASH1 mRNA translation and is required for its localization. *Genes Dev.* 18:1452-1465.
- Gunkel, N., T. Yano, F.H. Markussen, L.C. Olsen, and A. Ephrussi. 1998. Localization-dependent translation requires a functional interaction between the 5' and 3' ends of oskar mRNA. *Genes Dev.* 12:1652-1664.
- Guo, F., L. Wan, A. Zheng, V. Stanevich, Y. Wei, K.A. Satyshur, M. Shen, W. Lee, Y. Kang, and Y. Xing. 2014. Structural insights into the tumor-promoting function of the MTDH-SND1 complex. *Cell reports.* 8:1704-1713.
- Halperin, L., J. Jung, and M. Michalak. 2014. The many functions of the endoplasmic reticulum chaperones and folding enzymes. *IUBMB Life.* 66:318-326.
- Harada, Y., H. Li, H. Li, and W.J. Lennarz. 2009. Oligosaccharyltransferase directly binds to ribosome at a location near the translocon-binding site. *Proc Natl Acad Sci U S A.* 106:6945-6949.
- Hartmann, E., T. Sommer, S. Prehn, D. Gorlich, S. Jentsch, and T.A. Rapoport. 1994. Evolutionary conservation of components of the protein translocation complex. *Nature.* 367:654-657.
- Helle, S.C., G. Kanfer, K. Kolar, A. Lang, A.H. Michel, and B. Kornmann. 2013. Organization and function of membrane contact sites. *Biochim Biophys Acta.* 1833:2526-2541.
- Hoffman, A.M., Q. Chen, T. Zheng, and C.V. Nicchitta. 2019. Heterogeneous translational landscape of the endoplasmic reticulum revealed by ribosome proximity labeling and transcriptome analysis. *J Biol Chem.* 294:8942-8958.

- Hsu, J.C., D.W. Reid, A.M. Hoffman, D. Sarkar, and C.V. Nicchitta. 2018. Oncoprotein AEG-1 is an endoplasmic reticulum RNA-binding protein whose interactome is enriched in organelle resident protein-encoding mRNAs. *RNA*. 24:688-703.
- Hung, V., S.S. Lam, N.D. Udeshi, T. Svinikina, G. Guzman, V.K. Mootha, S.A. Carr, and A.Y. Ting. 2017. Proteomic mapping of cytosol-facing outer mitochondrial and ER membranes in living human cells by proximity biotinylation. *eLife*. 6.
- Huttelmaier, S., D. Zenklusen, M. Lederer, J. Dichtenberg, M. Lorenz, X. Meng, G.J. Bassell, J. Condeelis, and R.H. Singer. 2005. Spatial regulation of beta-actin translation by Src-dependent phosphorylation of ZBP1. *Nature*. 438:512-515.
- Ichimura, T., Ohsumi, T., Shindo, Y., Ohwada, T., Yagame, H., Momose, Y., Omata, S., and Sugano, H. 1992. Isolation and some properties of a 34kD membrane protein that may be essential for ribosome binding in rat liver rough microsomes. *FEBS Lett*. 296:7-10.
- Ichimura, T., Y. Shindo, Y. Uda, T. Ohsumi, S. Omata, and H. Sugano. 1993. Anti-(p34 protein) antibodies inhibit ribosome binding to and protein translocation across the rough microsomal membrane. *FEBS Lett*. 326:241-245.
- Igbaria, A., P.I. Merksamer, A. Trusina, F. Tilahun, J.R. Johnson, O. Brandman, N.J. Krogan, J.S. Weissman, and F.R. Papa. 2019. Chaperone-mediated reflux of secretory proteins to the cytosol during endoplasmic reticulum stress. *Proc Natl Acad Sci U S A*. 116:11291-11298.
- Jadhav, B., M. McKenna, N. Johnson, S. High, I. Sinning, and M.R. Pool. 2015. Mammalian SRP receptor switches the Sec61 translocase from Sec62 to SRP-dependent translocation. *Nature communications*. 6:10133.
- Jagannathan, S., J.C. Hsu, D.W. Reid, Q. Chen, W.J. Thompson, A.M. Moseley, and C.V. Nicchitta. 2014. Multifunctional Roles for the Protein Translocation Machinery in RNA Anchoring to the Endoplasmic Reticulum. *J Biol Chem*. 289:25907-25924.
- Jagannathan, S., C. Nwosu, and C.V. Nicchitta. 2011. Analyzing mRNA localization to the endoplasmic reticulum via cell fractionation. *Methods Mol Biol*. 714:301-321.
- Jan, C.H., C.C. Williams, and J.S. Weissman. 2014. Principles of ER cotranslational translocation revealed by proximity-specific ribosome profiling. *Science*. 346:1257521.
- Jan, C.H., C.C. Williams, and J.S. Weissman. 2015. LOCAL TRANSLATION. Response to Comment on "Principles of ER cotranslational translocation revealed by proximity-specific ribosome profiling". *Science*. 348:1217.
- Johnson, A.E., and M.A. van Waes. 1999. The translocon: a dynamic gateway at the ER membrane. *Annu Rev Cell Dev Biol*. 15:799-842.
- Kelleher, D.J., G. Kreibich, and R. and Gilmore. 1992. Oligosaccharyltransferase activity is associated with a protein complex composed of ribophorins I and II and a 48 kD protein. *Cell*. 69:55-65.
- Khong, A., T. Matheny, S. Jain, S.F. Mitchell, J.R. Wheeler, and R. Parker. 2017. The Stress Granule Transcriptome Reveals Principles of mRNA Accumulation in Stress Granules. *Mol Cell*. 68:808-820 e805.
- Kim, D.I., K.C. Birendra, W. Zhu, K. Motamedchaboki, V. Doye, and K.J. Roux. 2014. Probing nuclear pore complex architecture with proximity-dependent biotinylation. *Proc Natl Acad Sci U S A*. 111:E2453-2461.

- Kopczynski, C.C., J.N. Noordermeer, T.L. Serano, W.Y. Chen, J.D. Pendleton, S. Lewis, C.S. Goodman, and G.M. Rubin. 1998. A high throughput screen to identify secreted and transmembrane proteins involved in *Drosophila* embryogenesis. *Proc Natl Acad Sci U S A.* 95:9973-9978.
- Koppers, M., R. Cagnetta, T. Shigeoka, L.C. Wunderlich, P. Vallejo-Ramirez, J. Qiaojin Lin, S. Zhao, M.A. Jakobs, A. Dwivedy, M.S. Minett, A. Bellon, C.F. Kaminski, W.A. Harris, J.G. Flanagan, and C.E. Holt. 2019. Receptor-specific interactome as a hub for rapid cue-induced selective translation in axons. *eLife.* 8.
- Kreibich, G., C.M. Freienstein, B.N. Pereyra, B.L. Ulrich, and D.D. Sabatini. 1978a. Proteins of rough microsomal membranes related to ribosome binding. II. Cross-linking of bound ribosomes to specific membrane proteins exposed at the binding sites. *The Journal of cell biology.* 77:488-506.
- Kreibich, G., B.L. Ulrich, and D.D. Sabatini. 1978b. Proteins of rough microsomal membranes related to ribosome binding. I. Identification of ribophorins I and II, membrane proteins characteristics of rough microsomes. *The Journal of Cell Biology.* 77:464-487.
- Krupke, D.M., D.A. Begley, J.P. Sundberg, J.E. Richardson, S.B. Neuhauser, and C.J. Bult. 2017. The Mouse Tumor Biology Database: A Comprehensive Resource for Mouse Models of Human Cancer. *Cancer Res.* 77:e67-e70.
- Kusumi, A., T.K. Fujiwara, R. Chadda, M. Xie, T.A. Tsunoyama, Z. Kalay, R.S. Kasai, and K.G. Suzuki. 2012. Dynamic organizing principles of the plasma membrane that regulate signal transduction: commemorating the fortieth anniversary of Singer and Nicolson's fluid-mosaic model. *Annu Rev Cell Dev Biol.* 28:215-250.
- Kusumi, A., K.G. Suzuki, R.S. Kasai, K. Ritchie, and T.K. Fujiwara. 2011. Hierarchical mesoscale domain organization of the plasma membrane. *Trends Biochem Sci.* 36:604-615.
- Kwon, K., and D. Beckett. 2000. Function of a conserved sequence motif in biotin holoenzyme synthetases. *Protein Sci.* 9:1530-1539.
- Lang, S., J. Benedix, S.V. Fedeles, S. Schorr, C. Schirra, N. Schauble, C. Jalal, M. Greiner, S. Hassdenteufel, J. Tatzelt, B. Kreutzer, L. Edelmann, E. Krause, J. Rettig, S. Somlo, R. Zimmermann, and J. Dudek. 2012. Different effects of Sec61alpha, Sec62 and Sec63 depletion on transport of polypeptides into the endoplasmic reticulum of mammalian cells. *J Cell Sci.* 125:1958-1969.
- Lang, S., S. Pfeffer, P.H. Lee, A. Cavalie, V. Helms, F. Forster, and R. Zimmermann. 2017. An Update on Sec61 Channel Functions, Mechanisms, and Related Diseases. *Front Physiol.* 8:887.
- Lee, J.E., P.I. Cathey, H. Wu, R. Parker, and G.K. Voeltz. 2020. Endoplasmic reticulum contact sites regulate the dynamics of membraneless organelles. *Science.* 367.
- Lerner, R.S., R.M. Seiser, T. Zheng, P.J. Lager, M.C. Reedy, J.D. Keene, and C.V. Nicchitta. 2003. Partitioning and translation of mRNAs encoding soluble proteins on membrane-bound ribosomes. *Rna.* 9:1123-1137.
- Levy, R., M. Wiedmann, and G. Kreibich. 2001. In vitro binding of ribosomes to the beta subunit of the Sec61p protein translocation complex. *J Biol Chem.* 276:2340-2346.

- Li, C.L., W.Z. Yang, Y.P. Chen, and H.S. Yuan. 2008. Structural and functional insights into human Tudor-SN, a key component linking RNA interference and editing. *Nucleic Acids Res.* 36:3579-3589.
- Linxweiler, M., B. Schick, and R. Zimmermann. 2017. Let's talk about Secs: Sec61, Sec62 and Sec63 in signal transduction, oncology and personalized medicine. *Signal Transduct Target Ther.* 2:17002.
- Lomize, A.L., J.M. Hage, and I.D. Pogozheva. 2018. Membranome 2.0: database for proteome-wide profiling of bitopic proteins and their dimers. *Bioinformatics.* 34:1061-1062.
- Lomize, A.L., M.A. Lomize, S.R. Krolicki, and I.D. Pogozheva. 2017. Membranome: a database for proteome-wide analysis of single-pass membrane proteins. *Nucleic Acids Res.* 45:D250-D255.
- Maere, S., K. Heymans, and M. Kuiper. 2005. BiNGO: a Cytoscape plugin to assess overrepresentation of gene ontology categories in biological networks. *Bioinformatics.* 21:3448-3449.
- Mellacheruvu, D., Z. Wright, A.L. Couzens, J.P. Lambert, N.A. St-Denis, T. Li, Y.V. Miteva, S. Hauri, M.E. Sardi, T.Y. Low, V.A. Halim, R.D. Bagshaw, N.C. Hubner, A. Al-Hakim, A. Bouchard, D. Faubert, D. Fermin, W.H. Dunham, M. Goudreault, Z.Y. Lin, B.G. Badillo, T. Pawson, D. Durocher, B. Coulombe, R. Aebersold, G. Superti-Furga, J. Colinge, A.J. Heck, H. Choi, M. Gstaiger, S. Mohammed, I.M. Cristea, K.L. Bennett, M.P. Washburn, B. Raught, R.M. Ewing, A.C. Gingras, and A.I. Nesvizhskii. 2013. The CRAPome: a contaminant repository for affinity purification-mass spectrometry data. *Nat Methods.* 10:730-736.
- Micklem, D.R., J. Adams, S. Grunert, and D. St Johnston. 2000. Distinct roles of two conserved Staufen domains in oskar mRNA localization and translation. *EMBO J.* 19:1366-1377.
- Migliaccio, G., C.V. Nicchitta, and G. Blobel. 1992. The signal sequence receptor, unlike the signal recognition particle receptor, is not essential for protein translocation. *J. Cell Biol.* 117:15-25.
- Moti, N., J. Yu, G. Boncompain, F. Perez, and D.M. Virshup. 2019. Wnt traffic from endoplasmic reticulum to filopodia. *PloS one.* 14:e0212711.
- Mueckler, M.M., and H.C. Pitot. 1981. Structure and function of rat liver polysome populations. I. Complexity, frequency distribution, and degree of uniqueness of free and membrane-bound polysomal polyadenylate-containing RNA populations. *J Cell Biol.* 90:495-506.
- Mueckler, M.M., and H.C. Pitot. 1982. Structure and function of rat liver polysome populations. II. Characterization of polyadenylate-containing mRNA associated with subpopulations of membrane-bound particles. *J Cell Biol.* 94:297-307.
- Muller, L., M.D. de Escauriaza, P. Lajoie, M. Theis, M. Jung, A. Muller, C. Burgard, M. Greiner, E.L. Snapp, J. Dudek, and R. Zimmermann. 2010. Evolutionary gain of function for the ER membrane protein Sec62 from yeast to humans. *Mol Biol Cell.* 21:691-703.
- Muller, M., and G. Blobel. 1984. In vitro translocation of bacterial proteins across the plasma membrane of Escherichia coli. *Proc Natl Acad Sci U S A.* 81:7421-7425.



- Murley, A., and J. Nunnari. 2016. The Emerging Network of Mitochondria-Organelle Contacts. *Mol Cell*. 61:648-653.
- Nesvizhskii, A.I., A. Keller, E. Kolker, and R. Aebersold. 2003. A statistical model for identifying proteins by tandem mass spectrometry. *Anal Chem*. 75:4646-4658.
- Nilsson, I., D.J. Kelleher, Y. Miao, Y. Shao, G. Kreibich, R. Gilmore, G. von Heijne, and A.E. Johnson. 2003. Photocross-linking of nascent chains to the STT3 subunit of the oligosaccharyltransferase complex. *J Cell Biol*. 161:715-725.
- Nilsson, I.M., and G. von Heijne. 1993. Determination of the distance between the oligosaccharyl transferase active site and the endoplasmic reticulum membrane. *J. Biol. Chem*. 268:5798-5801.
- Oberg, A.L., D.W. Mahoney, J.E. Eckel-Passow, C.J. Malone, R.D. Wolfinger, E.G. Hill, L.T. Cooper, O.K. Onuma, C. Spiro, T.M. Therneau, and H.R. Bergen, 3rd. 2008. Statistical analysis of relative labeled mass spectrometry data from complex samples using ANOVA. *J Proteome Res*. 7:225-233.
- Ohsumi, T., T. Ichimura, H. Sugano, S. Omata, T. Isobe, and R. Kuwano. 1993. Ribosome-binding protein p34 is a member of the leucine-rich-repeat-protein superfamily. *Biochem J*. 294 ( Pt 2):465-472.
- Paquin, N., M. Menade, G. Poirier, D. Donato, E. Drouet, and P. Chartrand. 2007. Local activation of yeast ASH1 mRNA translation through phosphorylation of Khd1p by the casein kinase Yck1p. *Mol Cell*. 26:795-809.
- Pfeffer, S., L. Burbaum, P. Unverdorben, M. Pech, Y. Chen, R. Zimmermann, R. Beckmann, and F. Forster. 2015. Structure of the native Sec61 protein-conducting channel. *Nature communications*. 6:8403.
- Pfeffer, S., J. Dudek, M. Gogala, S. Schorr, J. Linxweiler, S. Lang, T. Becker, R. Beckmann, R. Zimmermann, and F. Forster. 2014. Structure of the mammalian oligosaccharyl-transferase complex in the native ER protein translocon. *Nature communications*. 5:3072.
- Protter, D.S.W., and R. Parker. 2016. Principles and Properties of Stress Granules. *Trends Cell Biol*. 26:668-679.
- Rapoport, T.A. 2007. Protein translocation across the eukaryotic endoplasmic reticulum and bacterial plasma membranes. *Nature*. 450:663-669.
- Rees, J.S., X.W. Li, S. Perrett, K.S. Lilley, and A.P. Jackson. 2015. Protein Neighbors and Proximity Proteomics. *Molecular & cellular proteomics : MCP*. 14:2848-2856.
- Reid, D.W., and C.V. Nicchitta. 2012. Primary Role for Endoplasmic Reticulum-bound Ribosomes in Cellular Translation Identified by Ribosome Profiling. *J Biol Chem*. 287:5518-5527.
- Reid, D.W., and C.V. Nicchitta. 2015a. Diversity and selectivity in mRNA translation on the endoplasmic reticulum. *Nat Rev Mol Cell Biol*. 16:221-231.
- Reid, D.W., and C.V. Nicchitta. 2015b. LOCAL TRANSLATION. Comment on "Principles of ER cotranslational translocation revealed by proximity-specific ribosome profiling". *Science*. 348:1217.
- Roux, K.J., D.I. Kim, M. Raida, and B. Burke. 2012. A promiscuous biotin ligase fusion protein identifies proximal and interacting proteins in mammalian cells. *J Cell Biol*. 196:801-810.
- Sarkar, D. 2013. AEG-1/MTDH/LYRIC in liver cancer. *Adv Cancer Res*. 120:193-221.

- Savitz, A.J., and D.I. Meyer. 1993. 180-kD ribosome receptor is essential for both ribosome binding and protein translocation. *J Cell Biol.* 120:853-863.
- Schwarz, D.S., and M.D. Blower. 2016. The endoplasmic reticulum: structure, function and response to cellular signaling. *Cell Mol Life Sci.* 73:79-94.
- Sears, R.M., D.G. May, and K.J. Roux. 2019. BioID as a Tool for Protein-Proximity Labeling in Living Cells. *Methods Mol Biol.* 2012:299-313.
- Shadforth, I.P., T.P. Dunkley, K.S. Lilley, and C. Bessant. 2005. i-Tracker: for quantitative proteomics using iTRAQ. *BMC Genomics.* 6:145.
- Shaffer, K.L., A. Sharma, E.L. Snapp, and R.S. Hegde. 2005. Regulation of protein compartmentalization expands the diversity of protein function. *Dev Cell.* 9:545-554.
- Simsek, D., G.C. Tiu, R.A. Flynn, G.W. Byeon, K. Leppek, A.F. Xu, H.Y. Chang, and M. Barna. 2017. The Mammalian Ribo-interactome Reveals Ribosome Functional Diversity and Heterogeneity. *Cell.* 169:1051-1065 e1018.
- Singer, S.J., and G.L. Nicolson. 1972. The fluid mosaic model of the structure of cell membranes. *Science.* 175:720-731.
- Smibert, C.A., Y.S. Lie, W. Shillinglaw, W.J. Henzel, and P.M. Macdonald. 1999. Smaug, a novel and conserved protein, contributes to repression of nanos mRNA translation in vitro. *RNA.* 5:1535-1547.
- Smith, C.M., T.F. Hayamizu, J.H. Finger, S.M. Bello, I.J. McCright, J. Xu, R.M. Baldarelli, J.S. Beal, J. Campbell, L.E. Corbani, P.J. Frost, J.R. Lewis, S.C. Giannatto, D. Miers, D.R. Shaw, J.A. Kadin, J.E. Richardson, C.L. Smith, and M. Ringwald. 2019. The mouse Gene Expression Database (GXD): 2019 update. *Nucleic Acids Res.* 47:D774-D779.
- Sowa, M.E., E.J. Bennett, S.P. Gygi, and J.W. Harper. 2009. Defining the human deubiquitinating enzyme interaction landscape. *Cell.* 138:389-403.
- Stephens, S.B., R.D. Dodd, J.W. Brewer, P.J. Lager, J.D. Keene, and C.V. Nicchitta. 2005. Stable ribosome binding to the endoplasmic reticulum enables compartment-specific regulation of mRNA translation. *Mol Biol Cell.* 16:5819-5831.
- Szklarczyk, D., A.L. Gable, D. Lyon, A. Junge, S. Wyder, J. Huerta-Cepas, M. Simonovic, N.T. Doncheva, J.H. Morris, P. Bork, L.J. Jensen, and C.V. Mering. 2019. STRING v11: protein-protein association networks with increased coverage, supporting functional discovery in genome-wide experimental datasets. *Nucleic Acids Res.* 47:D607-D613.
- Szklarczyk, D., J.H. Morris, H. Cook, M. Kuhn, S. Wyder, M. Simonovic, A. Santos, N.T. Doncheva, A. Roth, P. Bork, L.J. Jensen, and C. von Mering. 2017. The STRING database in 2017: quality-controlled protein-protein association networks, made broadly accessible. *Nucleic Acids Res.* 45:D362-D368.
- Tatematsu, M., K. Funami, N. Ishii, T. Seya, C. Obuse, and M. Matsumoto. 2015. LRRRC59 Regulates Trafficking of Nucleic Acid-Sensing TLRs from the Endoplasmic Reticulum via Association with UNC93B1. *J Immunol.* 195:4933-4942.
- Tazawa, S., M. Unuma, N. Tondokoro, Y. Asano, T. Ohsumi, T. Ichimura, and H. Sugano. 1991. Identification of a membrane protein responsible for ribosome binding in rough microsomal membranes. *J. Biochem. Tokyo.* 109:89 - 98.

- Tiruchinapalli, D.M., Y. Oleynikov, S. Kelic, S.M. Shenoy, A. Hartley, P.K. Stanton, R.H. Singer, and G.J. Bassell. 2003. Activity-dependent trafficking and dynamic localization of zipcode binding protein 1 and beta-actin mRNA in dendrites and spines of hippocampal neurons. *J Neurosci.* 23:3251-3261.
- Uhlen, M., L. Fagerberg, B.M. Hallstrom, C. Lindskog, P. Oksvold, A. Mardinoglu, A. Sivertsson, C. Kampf, E. Sjostedt, A. Asplund, I. Olsson, K. Edlund, E. Lundberg, S. Navani, C.A. Szigartyo, J. Odeberg, D. Djureinovic, J.O. Takanen, S. Hober, T. Alm, P.H. Edqvist, H. Berling, H. Tegel, J. Mulder, J. Rockberg, P. Nilsson, J.M. Schwenk, M. Hamsten, K. von Feilitzen, M. Forsberg, L. Persson, F. Johansson, M. Zwahlen, G. von Heijne, J. Nielsen, and F. Ponten. 2015. Proteomics. Tissue-based map of the human proteome. *Science.* 347:1260419.
- Uhlen, M., P. Oksvold, L. Fagerberg, E. Lundberg, K. Jonasson, M. Forsberg, M. Zwahlen, C. Kampf, K. Wester, S. Hober, H. Wernerus, L. Bjorling, and F. Ponten. 2010. Towards a knowledge-based Human Protein Atlas. *Nat Biotechnol.* 28:1248-1250.
- Varnaite, R., and S.A. MacNeill. 2016. Meet the neighbors: Mapping local protein interactomes by proximity-dependent labeling with BioID. *Proteomics.* 16:2503-2518.
- Vidaki, M., F. Drees, T. Saxena, E. Lanslots, M.J. Taliaferro, A. Tatarakis, C.B. Burge, E.T. Wang, and F.B. Gertler. 2017. A Requirement for Mena, an Actin Regulator, in Local mRNA Translation in Developing Neurons. *Neuron.* 95:608-622 e605.
- Voigt, F., H. Zhang, X.A. Cui, D. Triebold, A.X. Liu, J. Eglinger, E.S. Lee, J.A. Chao, and A.F. Palazzo. 2017. Single-Molecule Quantification of Translation-Dependent Association of mRNAs with the Endoplasmic Reticulum. *Cell reports.* 21:3740-3753.
- Voorhees, R.M., I.S. Fernandez, S.H. Scheres, and R.S. Hegde. 2014. Structure of the mammalian ribosome-Sec61 complex to 3.4 Å resolution. *Cell.* 157:1632-1643.
- Walter, P., and Blobel, G. 1981a. Translocation of proteins across the endoplasmic reticulum. II. Signal recognition protein (SRP) mediates the selective binding to microsomal membranes of in vitro-assembled polysomes synthesizing secretory proteins. *Journal of Cell Biology.* 91:551-556.
- Walter, P., and Blobel, G. 1981b. Translocation of proteins across the endoplasmic reticulum. III. Signal recognition protein (SRP) causes signal sequence dependent and site-specific arrest of chain elongation that is released by microsomal membranes. *Journal of Cell Biology.* 91:557-561.
- Walter, P., and G. Blobel. 1980. Purification of a membrane-associated protein complex required for protein translocation across the endoplasmic reticulum. *Proc Natl Acad Sci U S A.* 77:7112-7116.
- Wild, R., J. Kowal, J. Eyring, E.M. Ngwa, M. Aebi, and K.P. Locher. 2018. Structure of the yeast oligosaccharyltransferase complex gives insight into eukaryotic N-glycosylation. *Science.* 359:545-550.
- Willett, M., M. Brocard, A. Davide, and S.J. Morley. 2011. Translation initiation factors and active sites of protein synthesis co-localize at the leading edge of migrating fibroblasts. *Biochem J.* 438:217-227.
- Wu, H., P. Carvalho, and G.K. Voeltz. 2018. Here, there, and everywhere: The importance of ER membrane contact sites. *Science.* 361.



- Xian, H., S. Yang, S. Jin, Y. Zhang, and J. Cui. 2020. LRRC59 modulates type I interferon signaling by restraining the SQSTM1/p62-mediated autophagic degradation of pattern recognition receptor DDX58/RIG-I. *Autophagy*. 16:408-418.
- Yang, Y., E. Anderson, and S. Zhang. 2018. Evaluation of six sample preparation procedures for qualitative and quantitative proteomics analysis of milk fat globule membrane. *Electrophoresis*. 39:2332-2339.
- Yasuda, K., T. Kotani, and M. Yamashita. 2013. A cis-acting element in the coding region of cyclin B1 mRNA couples subcellular localization to translational timing. *Developmental biology*. 382:517-529.
- Youn, J.Y., W.H. Dunham, S.J. Hong, J.D.R. Knight, M. Bashkurov, G.I. Chen, H. Bagci, B. Rathod, G. MacLeod, S.W.M. Eng, S. Angers, Q. Morris, M. Fabian, J.F. Cote, and A.C. Gingras. 2018. High-Density Proximity Mapping Reveals the Subcellular Organization of mRNA-Associated Granules and Bodies. *Mol Cell*. 69:517-532 e511.
- Zhang, Q., X. Meng, D. Li, S. Chen, J. Luo, L. Zhu, R.H. Singer, and W. Gu. 2017. Binding of DEAD-box helicase Dhh1 to the 5'-untranslated region of ASH1 mRNA represses localized translation of ASH1 in yeast cells. *J Biol Chem*. 292:9787-9800.
- Zoltewicz, J.S., A.M. Ashique, Y. Choe, G. Lee, S. Taylor, K. Phamluong, M. Solloway, and A.S. Peterson. 2009. Wnt signaling is regulated by endoplasmic reticulum retention. *PloS one*. 4:e6191.



**Figure 2**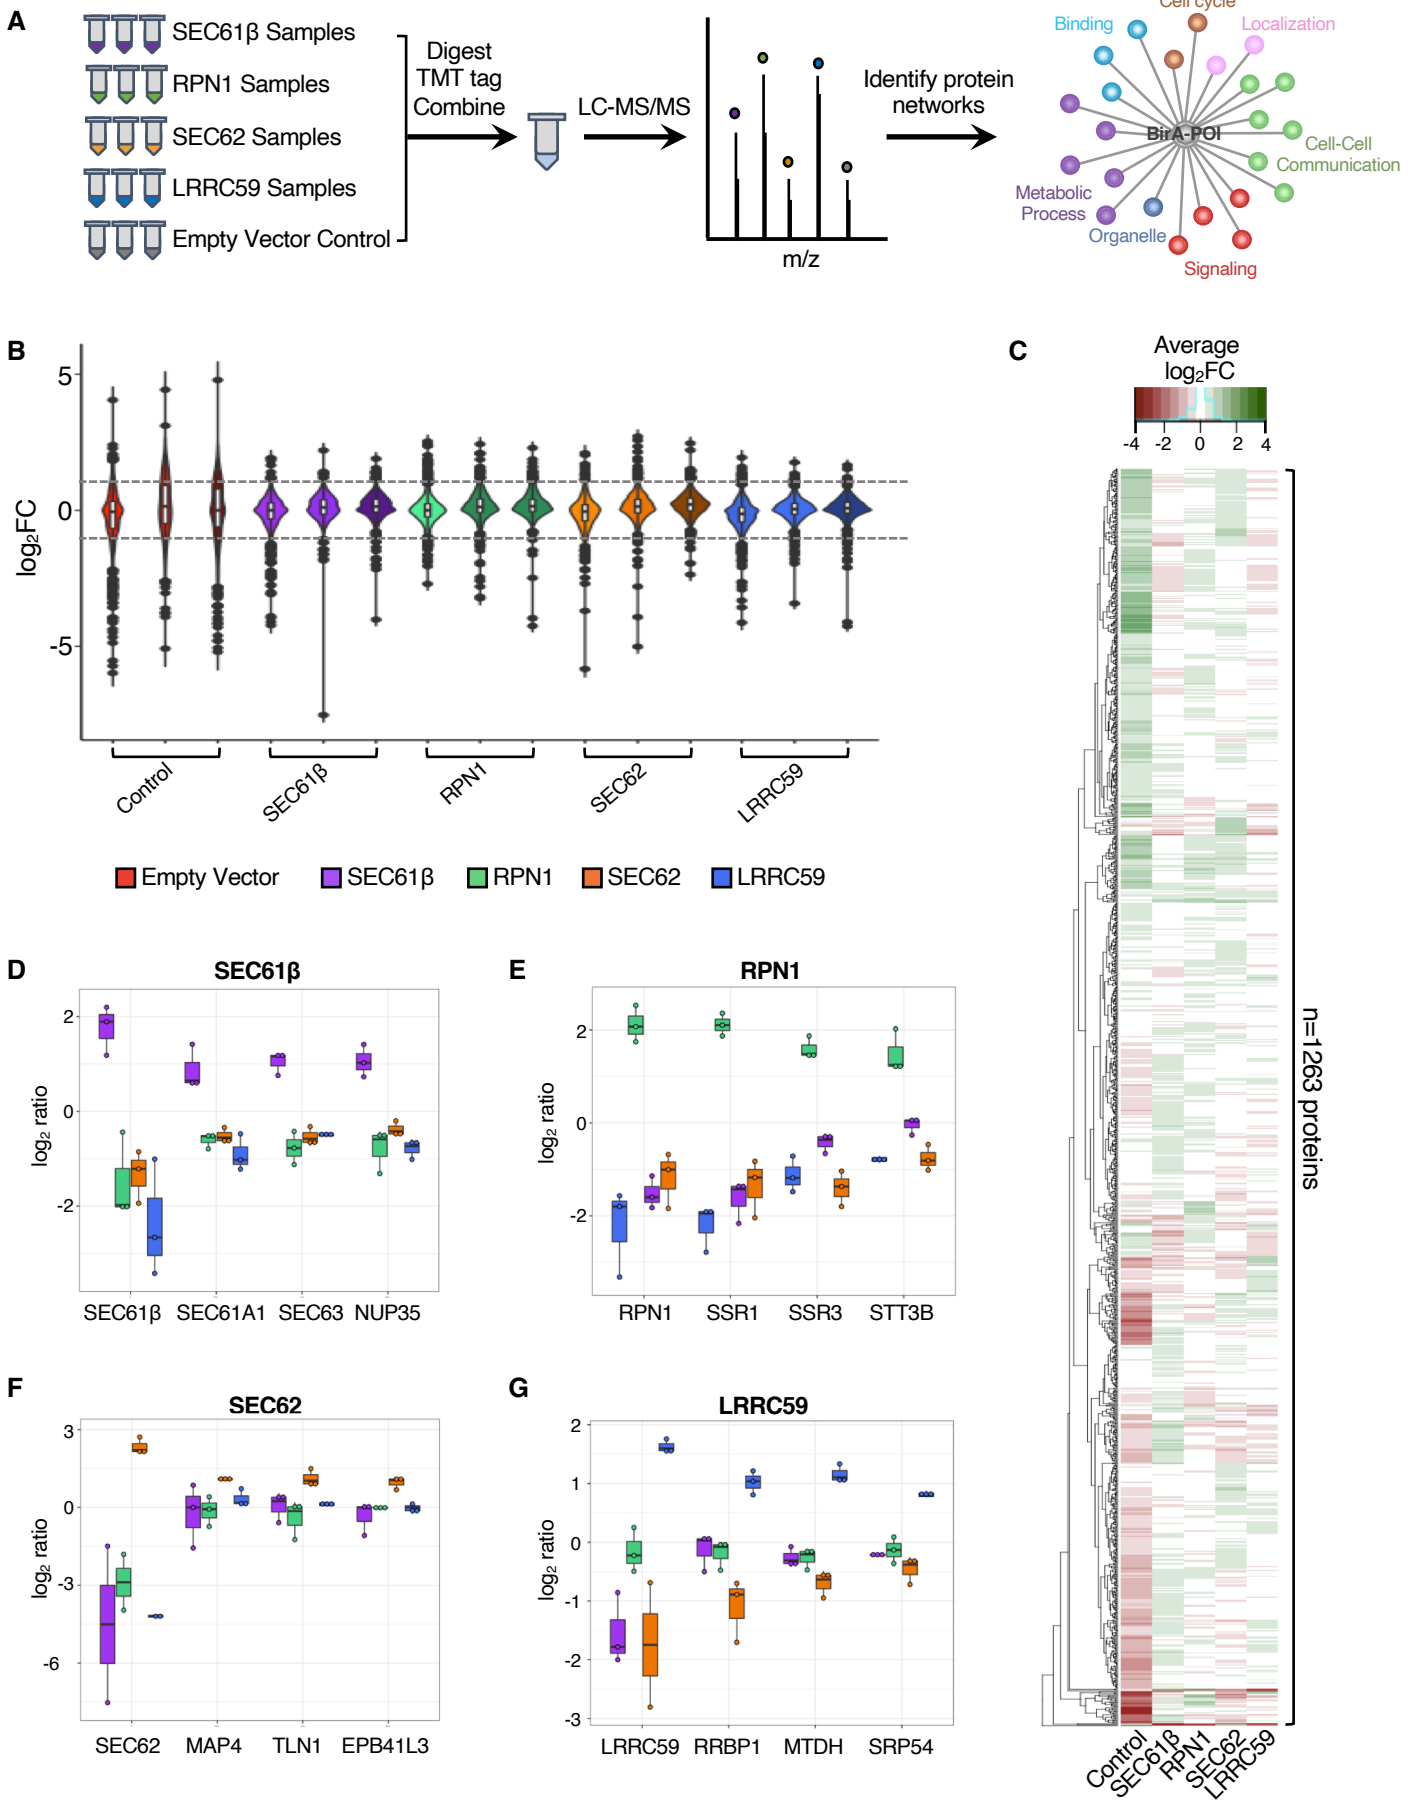

**Figure 3**

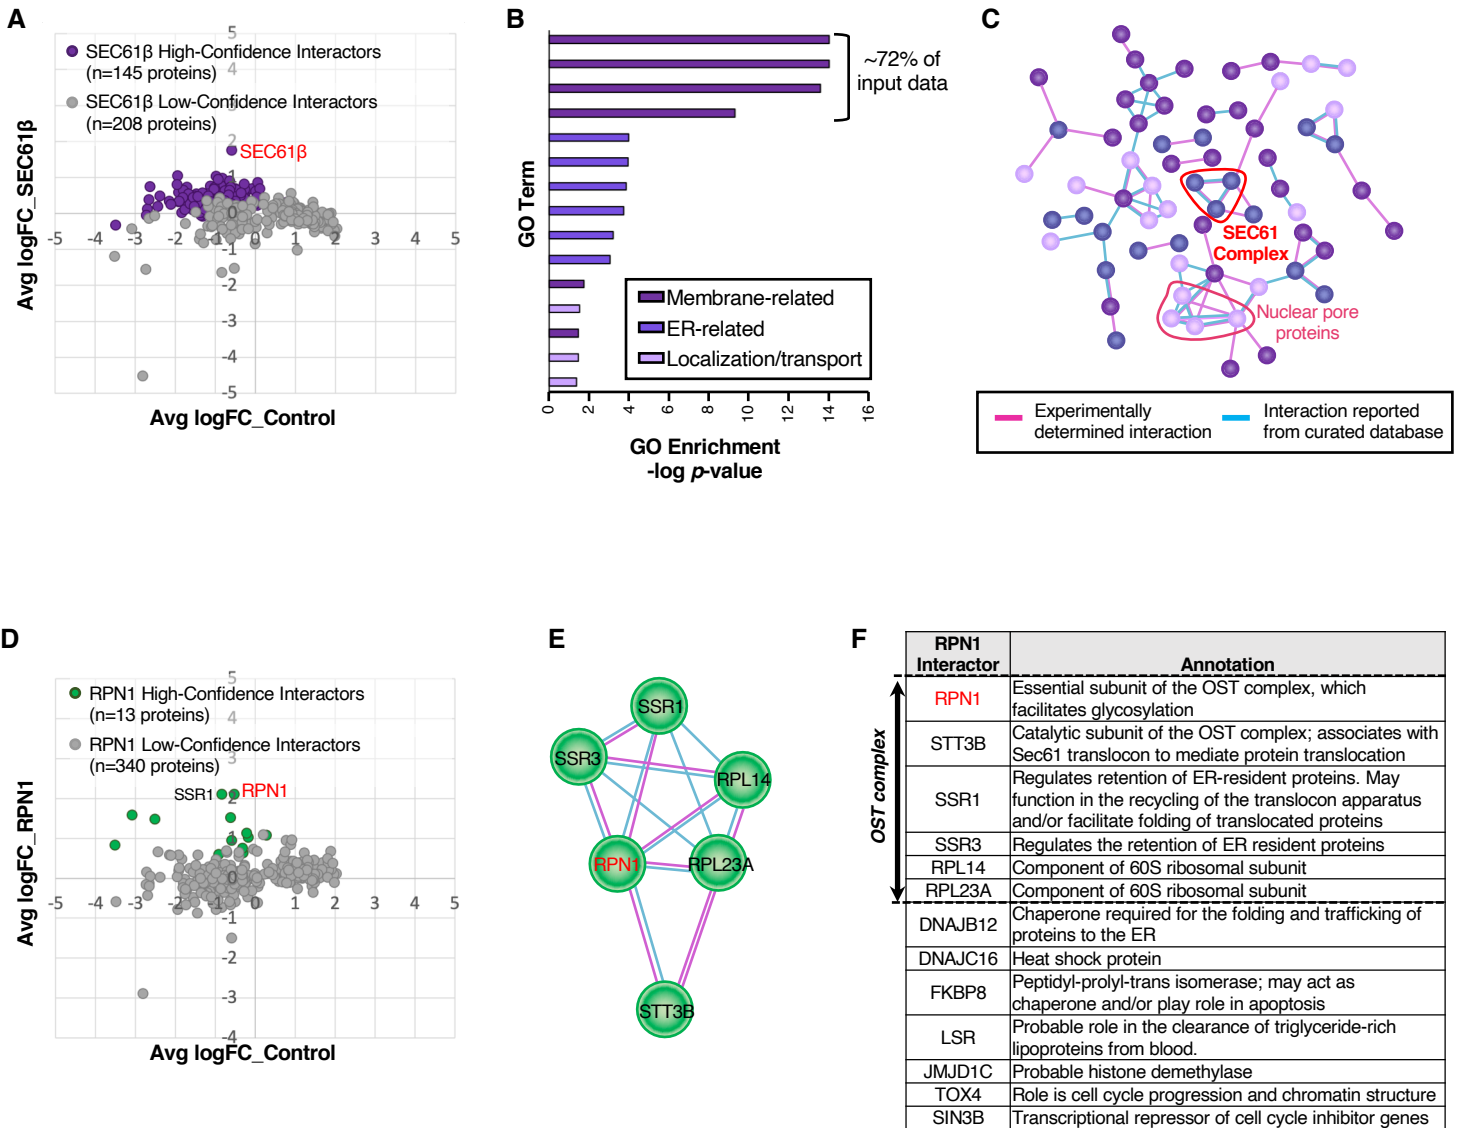

**Figure 4**

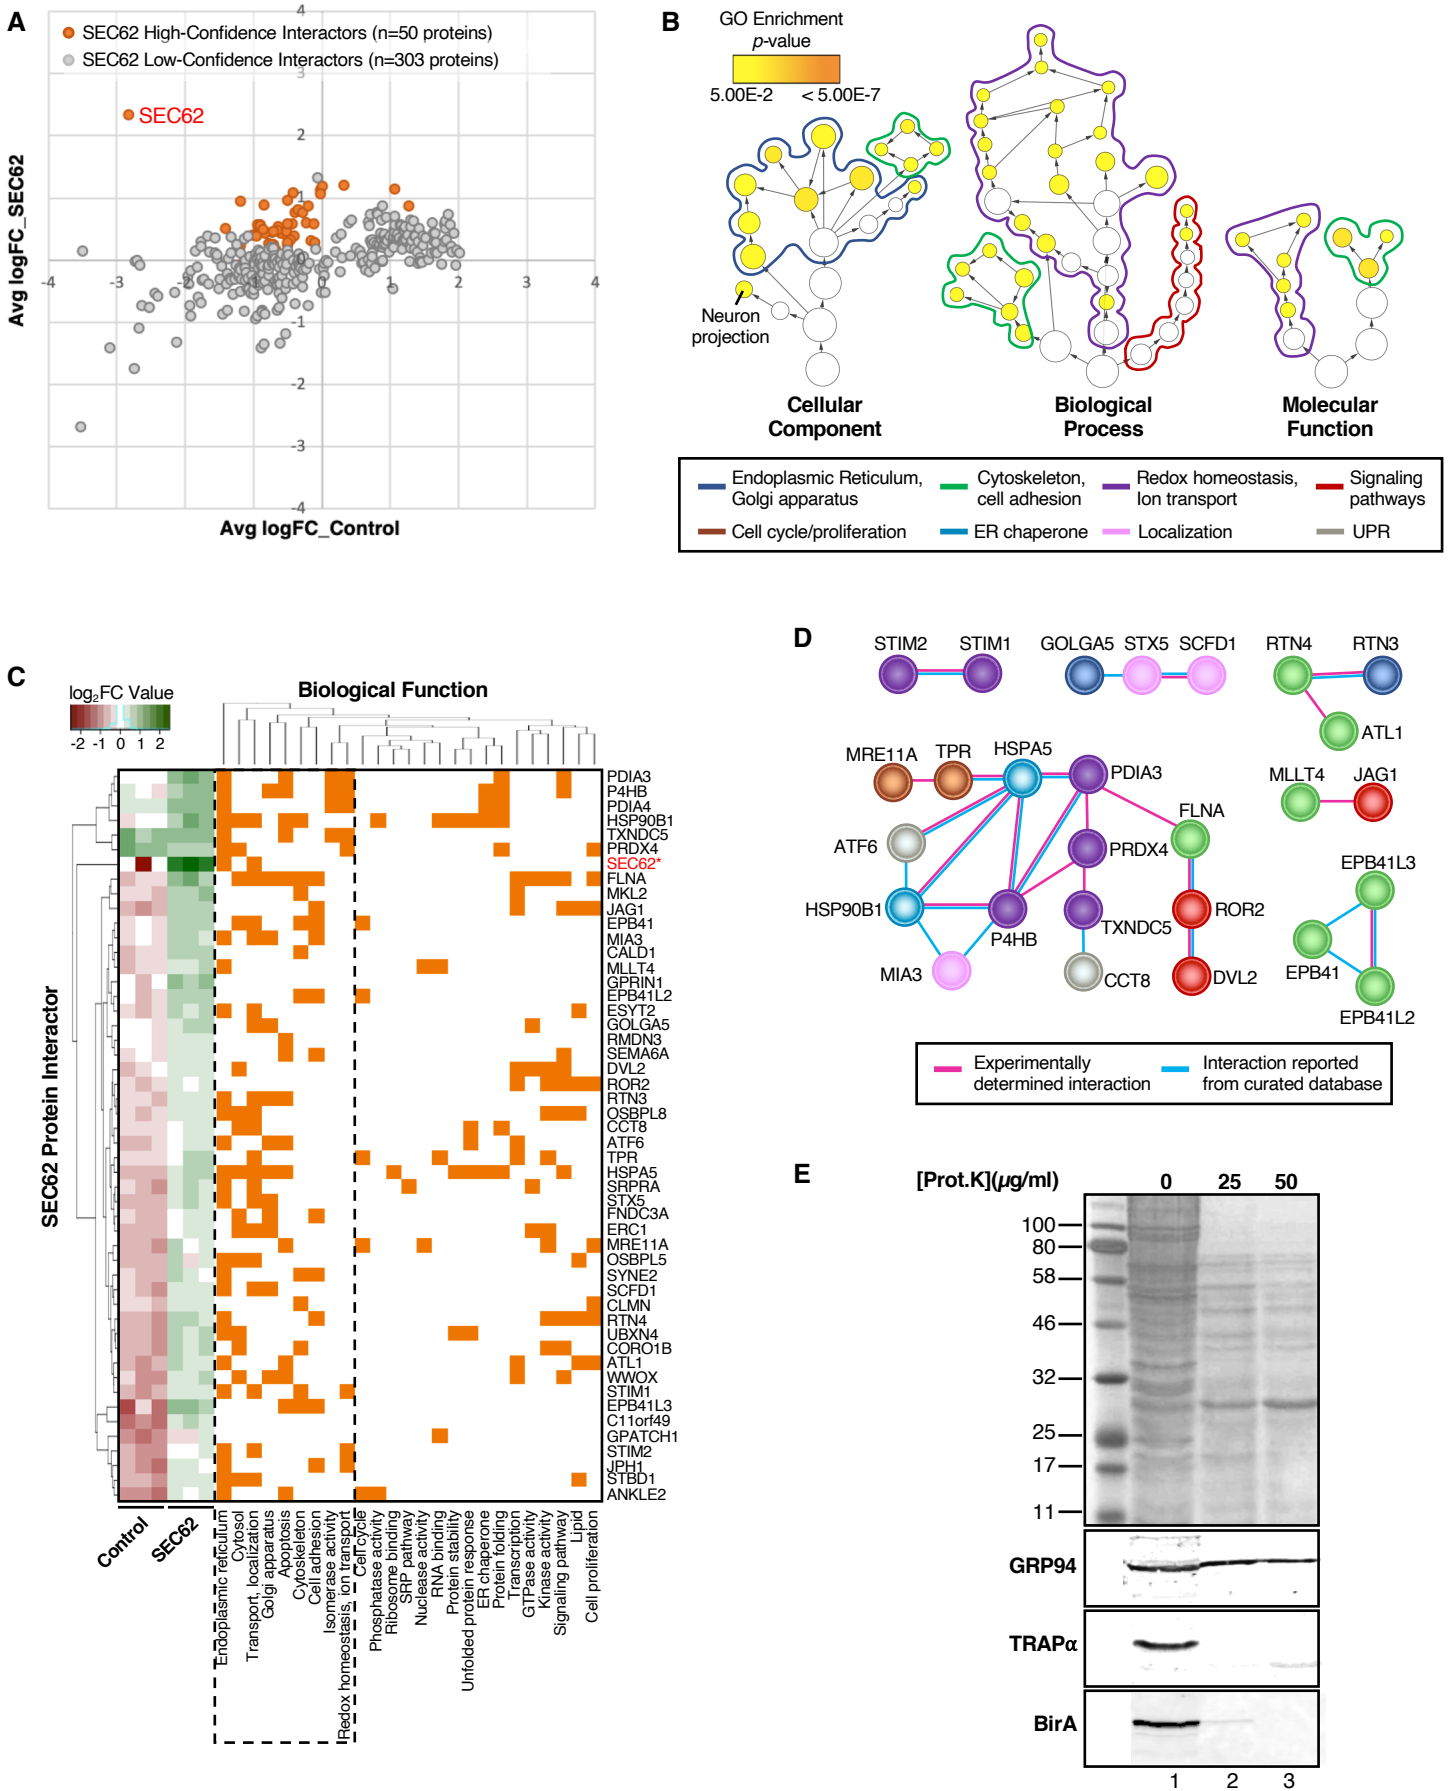

**Figure 5**

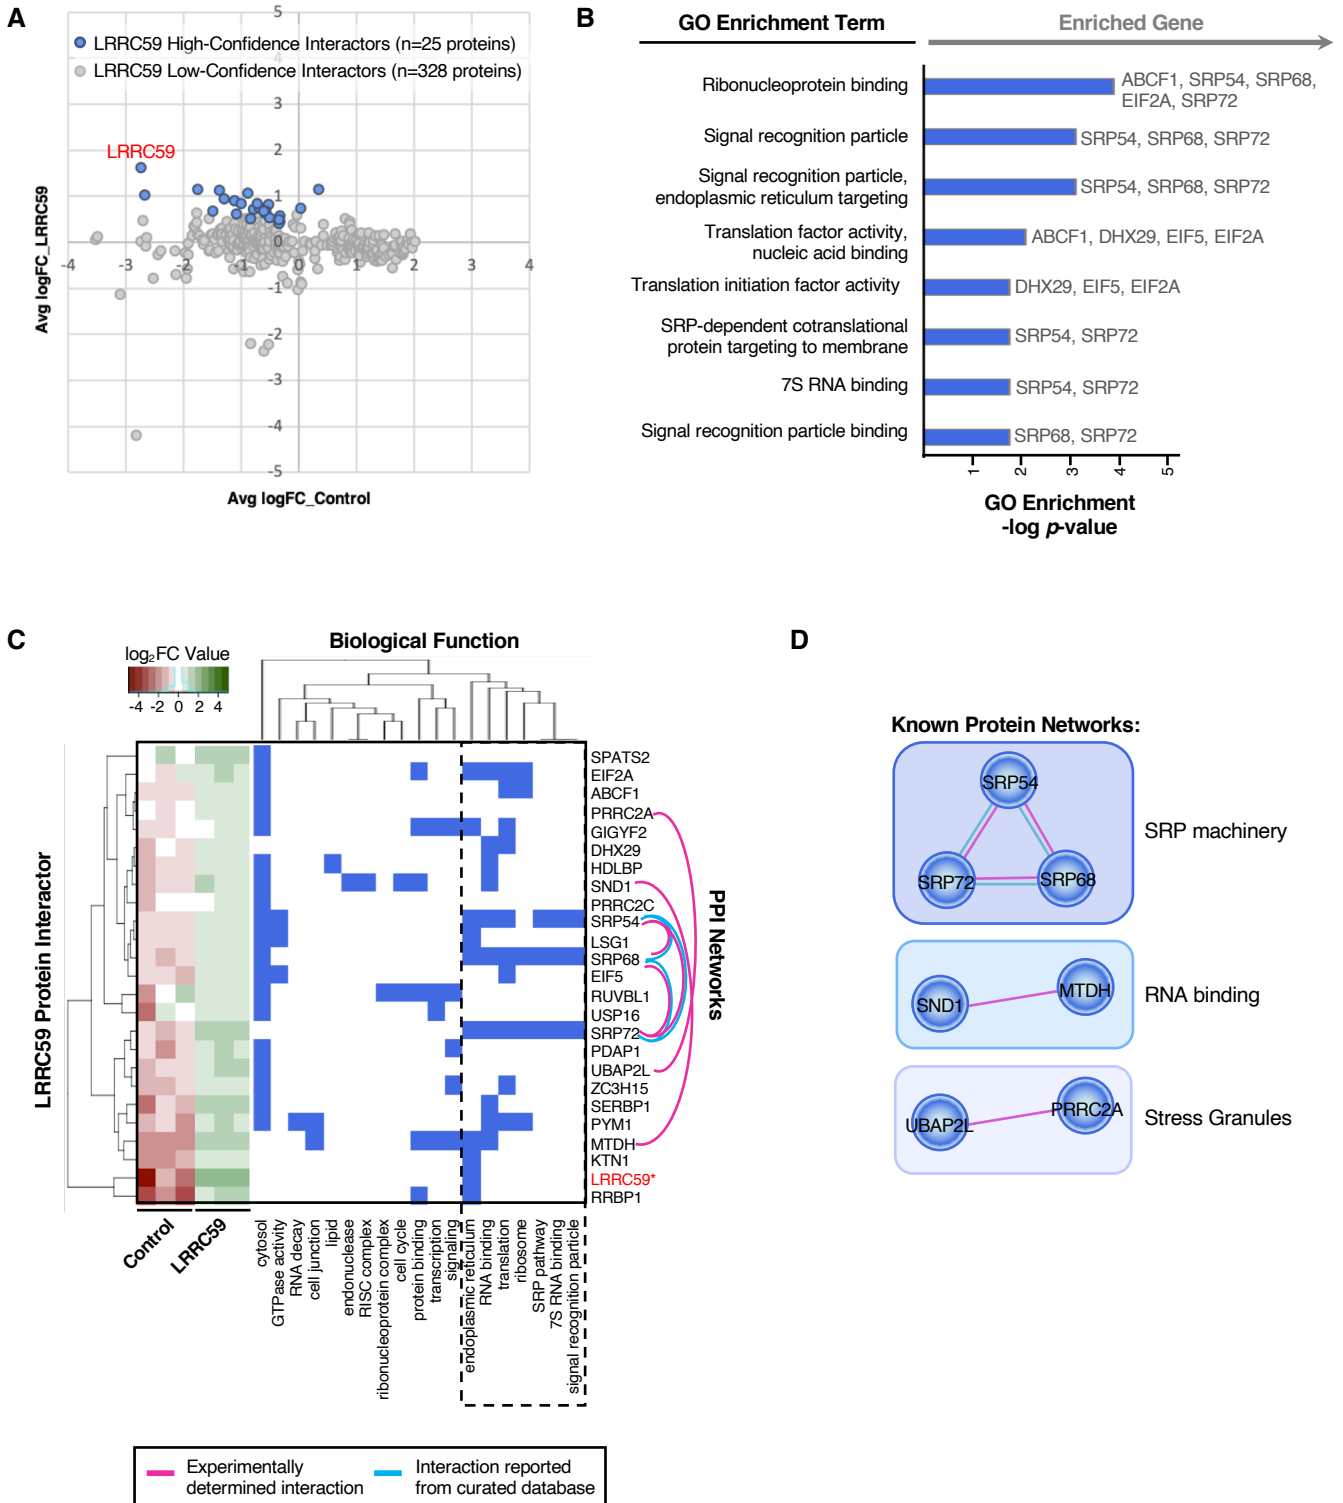

**Figure 6**

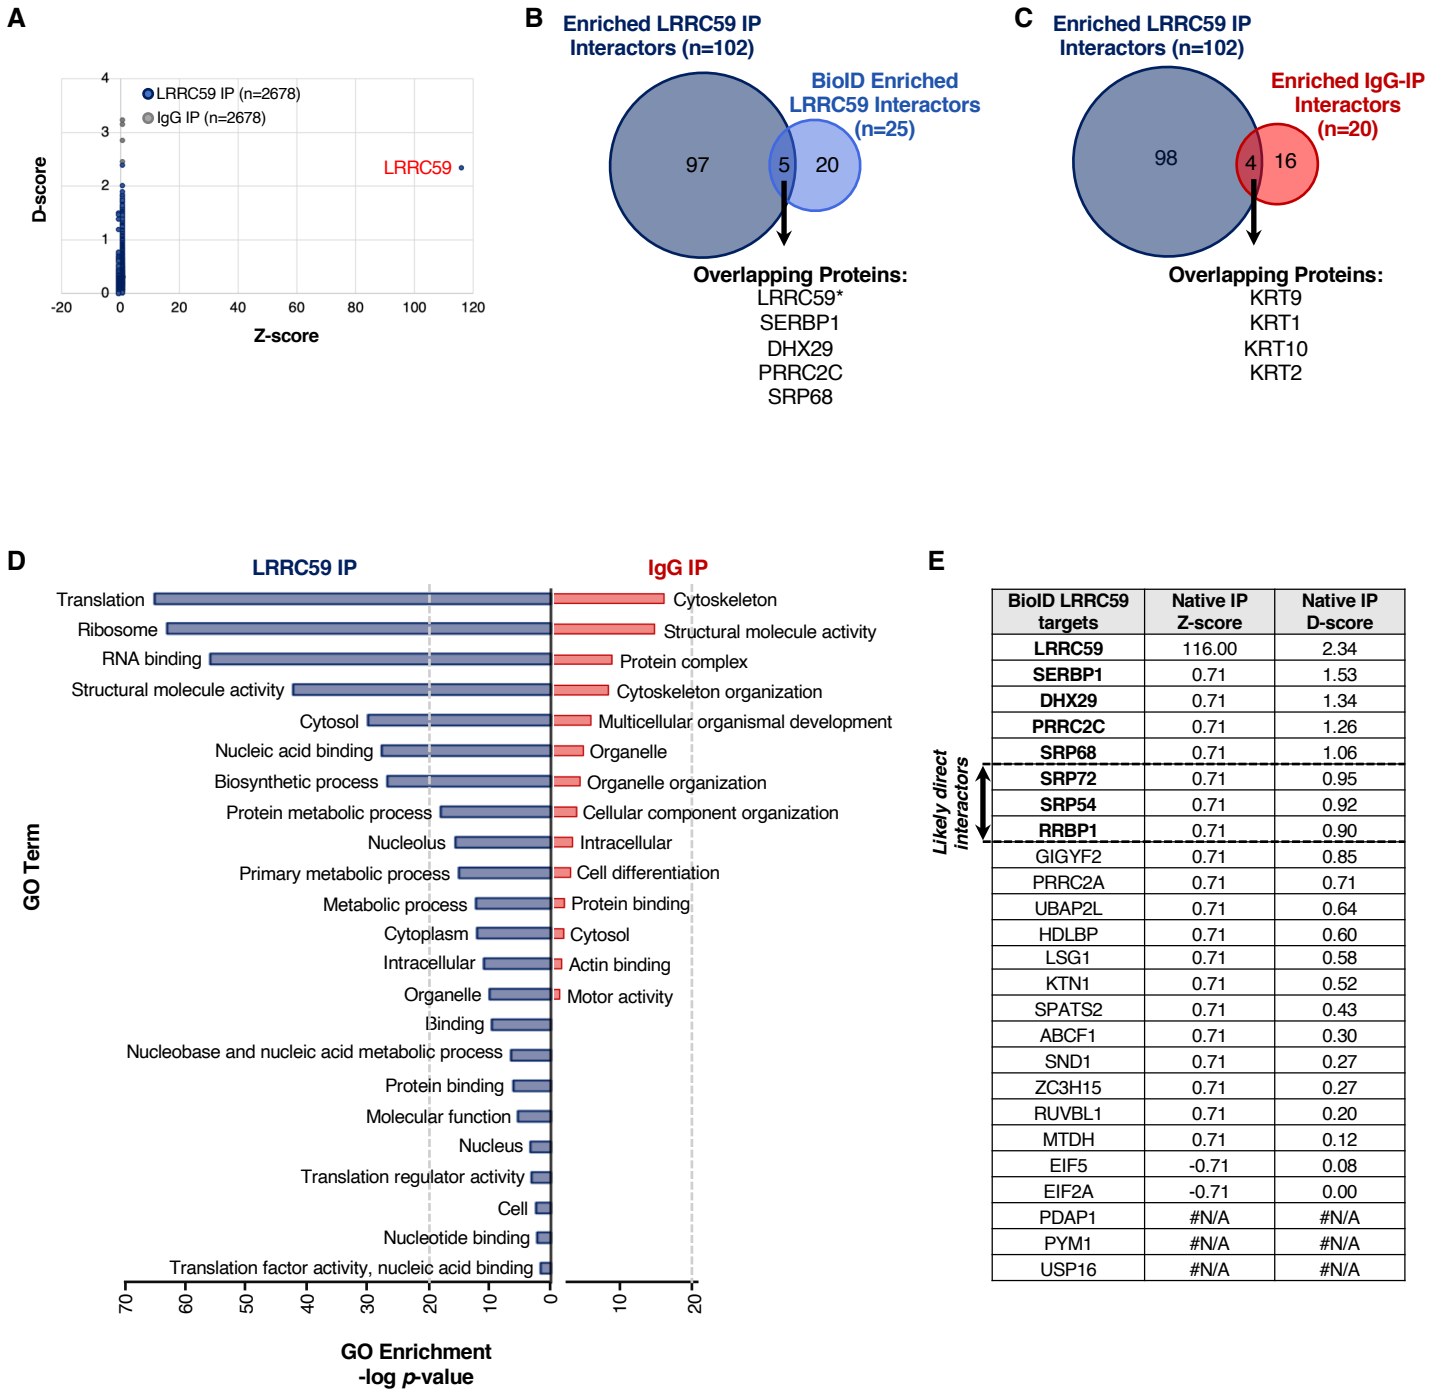

Figure 7

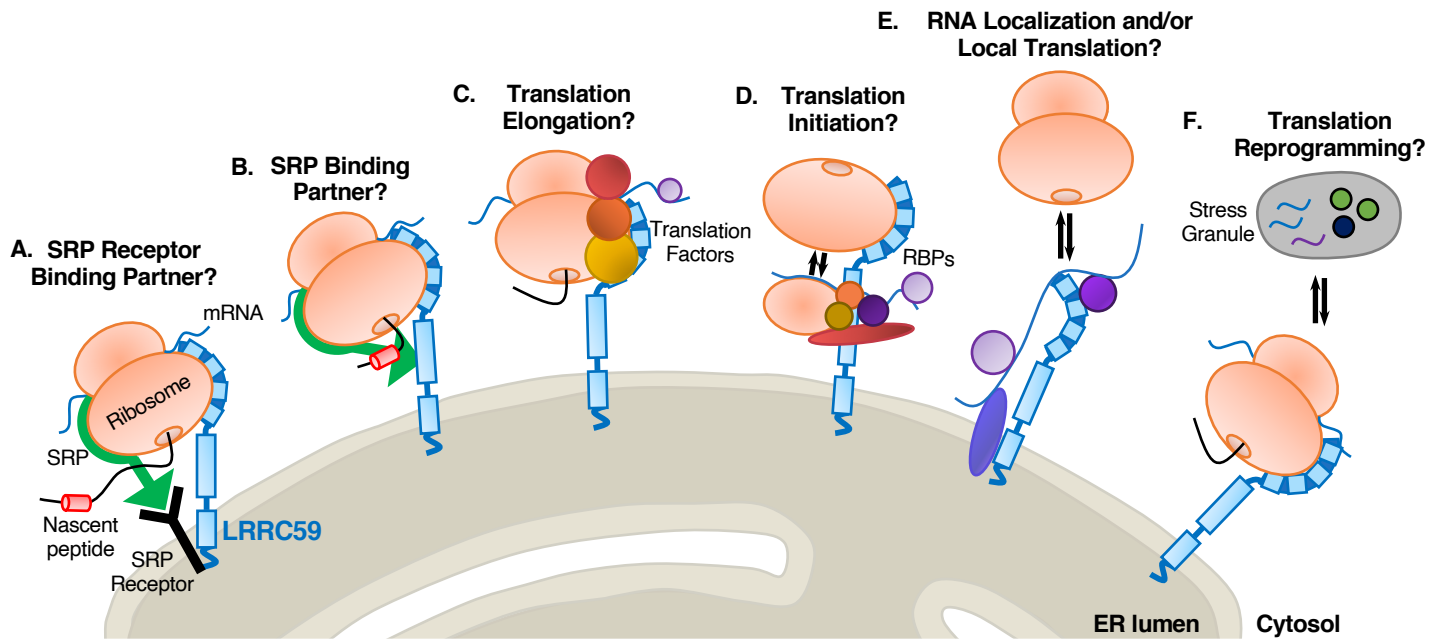



## Supplemental Figure 1 – pairs with Figures 3-4

**A**

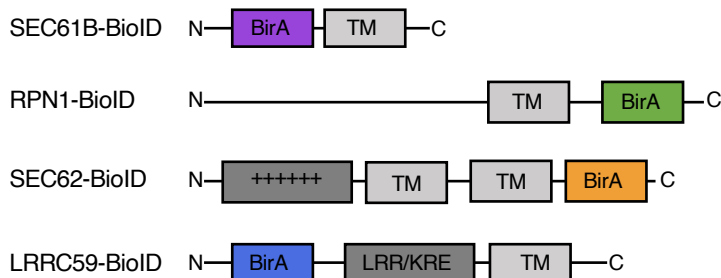

**B**

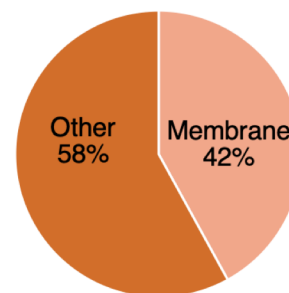

**C**

| UniProt_ID  | Gene ID | Molecular Weight | Localization          | Type     | Normalized Count Data | Bait   | GO Annotation                                                                                                       |
|-------------|---------|------------------|-----------------------|----------|-----------------------|--------|---------------------------------------------------------------------------------------------------------------------|
| MSPD2_HUMAN | MOSPD2  | 60 kDa           | Endoplasmic reticulum | Membrane | 2.38                  | Sec61B | chemotaxis, integral component of membrane                                                                          |
| TMX3_HUMAN  | TMX3    | 52 kDa           | Endoplasmic reticulum | Membrane | 1.19                  | Sec61B | cell redox homeostasis, isomerase activity, endoplasmic reticulum                                                   |
| PMYT1_HUMAN | PKMYT1  | 55 kDa           | Cytoplasm             | Soluble  | 1.92                  | Sec61B | endoplasmic reticulum, kinase activity                                                                              |
| S61A1_HUMAN | SEC61A1 | 52 kDa           | Endoplasmic reticulum | Membrane | 0.95                  | Sec61B | SRP-dependent cotranslational protein targeting to membrane, translocation, endoplasmic reticulum, ribosome binding |
| ITPR3_HUMAN | ITPR3   | 304 kDa          | Endoplasmic reticulum | Membrane | 5.91                  | Sec61B | endoplasmic reticulum, ion transport, positive regulation of cytosolic calcium ion concentration                    |
| GCP60_HUMAN | ACBD3   | 61 kDa           | Cytoplasm             | Soluble  | 1.42                  | Sec61B | Golgi apparatus, lipid metabolic process                                                                            |
| NU153_HUMAN | NUP153  | 154 kDa          | Nucleus               | Membrane | 8.91                  | Sec61B | protein binding, negative regulation of RNA export from nucleus, Ran GTPase binding                                 |
| SC61B_HUMAN | SEC61B  | 10 kDa           | Endoplasmic reticulum | Membrane | 6.30                  | Sec61B | SRP-dependent cotranslational protein targeting to membrane, translocation, endoplasmic reticulum, ribosome binding |
| SSRA_HUMAN  | SSR1    | 32 kDa           | Endoplasmic reticulum | Membrane | 3.08                  | RPN1   | endoplasmic reticulum                                                                                               |
| STT3B_HUMAN | STT3B   | 94 kDa           | Endoplasmic reticulum | Membrane | 10.16                 | RPN1   | co-translational protein modification, oligosaccharyl transferase activity, response to unfolded protein            |
| RPN1_HUMAN  | RPN1    | 69 kDa           | Endoplasmic reticulum | Membrane | 101.37                | RPN1   | proteasome complex, protein glycosylation, endoplasmic reticulum                                                    |
| FKBP8_HUMAN | FKBP8   | 45 kDa           | Mitochondrion         | Membrane | 7.81                  | RPN1   | isomerase activity, apoptosis, signaling pathway                                                                    |
| DJC16_HUMAN | DNAJC16 | 91 kDa           | Endoplasmic reticulum | Membrane | 7.72                  | RPN1   | cell redox homeostasis                                                                                              |
| SEC62_HUMAN | SEC62   | 46 kDa           | Endoplasmic reticulum | Membrane | 36.53                 | Sec62  | posttranslational protein targeting to membrane, translocation, endoplasmic reticulum                               |
| PRDX4_HUMAN | PRDX4   | 31 kDa           | Endoplasmic reticulum | Soluble  | 5.03                  | Sec62  | oxidoreductase activity, protein folding,                                                                           |
| PDIA3_HUMAN | PDIA3   | 57 kDa           | Endoplasmic reticulum | Soluble  | 4.93                  | Sec62  | cell redox homeostasis, isomerase activity, endoplasmic reticulum                                                   |
| COR1B_HUMAN | CORO1B  | 54 kDa           | Cytoplasm             | Soluble  | 4.71                  | Sec62  | cytoskeleton, protein localization                                                                                  |
| FLNA_HUMAN  | FLNA    | 281 kDa          | Cytoplasm             | Soluble  | 27.94                 | Sec62  | cytoskeleton, cell adhesion, GTPase activity                                                                        |
| E41L3_HUMAN | EPB41L3 | 121 kDa          | Nucleus               | Soluble  | 3.28                  | Sec62  | cytoskeleton, protein localization, cell adhesion, cell growth                                                      |
| ATF6A_HUMAN | ATF6    | 75 kDa           | Endoplasmic reticulum | Membrane | 2.55                  | Sec62  | unfolded protein response                                                                                           |
| SRP68_HUMAN | SRP68   | 71 kDa           | Cytoplasm             | Membrane | 14.54                 | LRR59  | SRP-dependent cotranslational protein targeting to membrane, ribosome binding, 7S RNA binding                       |
| SRP54_HUMAN | SRP54   | 56 kDa           | Cytoplasm             | Soluble  | 4.39                  | LRR59  | SRP-dependent cotranslational protein targeting to membrane, ribosome binding, 7S RNA binding, GTPase activity      |
| LYRIC_HUMAN | MTDH    | 64 kDa           | Cell membrane         | Membrane | 54.70                 | LRR59  | cell adhesion, signaling pathways                                                                                   |
| VIGLN_HUMAN | HDLBP   | 141 kDa          | Cytoplasm             | Soluble  | 3.80                  | LRR59  | lipid metabolic process, RNA binding                                                                                |
| SRP72_HUMAN | SRP72   | 75 kDa           | Nucleus               | Soluble  | 5.83                  | LRR59  | SRP-dependent cotranslational protein targeting to membrane, ribosome binding, 7S RNA binding                       |
| LRC59_HUMAN | LRRC59  | 35 kDa           | Endoplasmic reticulum | Membrane | 56.07                 | LRR59  | endoplasmic reticulum                                                                                               |
| SND1_HUMAN  | SND1    | 102 kDa          | Cytoplasm             | Soluble  | 16.67                 | LRR59  | endonuclease activity, RISC complex, RNA binding                                                                    |
| LSG1_HUMAN  | LSG1    | 75 kDa           | Cytoplasm             | Soluble  | 27.87                 | LRR59  | GTPase activity, protein transport                                                                                  |
| RRBP1_HUMAN | RRBP1   | 152 kDa          | Endoplasmic reticulum | Membrane | 57.81                 | LRR59  | endoplasmic reticulum, protein transport                                                                            |
| KTN1_HUMAN  | KTN1    | 156 kDa          | Cytoplasm             | Membrane | 78.32                 | LRR59  | endoplasmic reticulum, kinesin binding                                                                              |
